# Supplementary material for: System-based proteomic and metabonomic analysis of the Df(16)A+/− mouse identifies potential miR-185 targets and molecular pathway alterations
Source: PubMed Central journal article supplement — Mol Psychiatry. 2016 Mar 22;22(3):384–95. doi: 10.1038/mp.2016.27 (PMC5322275; doi:10.1038/mp.2016.27), 2016-03-22
Supplement: mp201627x1.pdf [file mp201627x1.pdf]

**Supplementary Table S1: List of measured analytes using multiplex immunoassay**

| Analyte name                                           | Accession Number | Uniprot ID   | Gene name                 |
|--------------------------------------------------------|------------------|--------------|---------------------------|
| Angiotensin-converting enzyme (ACE)                    | P09470           | ACE_MOUSE    | Ace Dcp1                  |
| Adiponectin                                            | Q60994           | ADIPO_MOUSE  | Adipoq                    |
| Angiotensinogen                                        | P11859           | ANGT_MOUSE   | Agt                       |
| Serum amyloid P-component (SAP)                        | P12246           | SAMP_MOUSE   | Apcs Ptx2 Sap             |
| Apolipoprotein A-I                                     | Q00623           | APOA1_MOUSE  | Apoa1                     |
| Complement C3                                          | P01027           | CO3_MOUSE    | C3                        |
| Eotaxin (C-C motif chemokine 11)                       | P48298           | CCL11_MOUSE  | Ccl11 Scya11              |
| C-C motif chemokine 12 (MCP-5)                         | Q62401           | CCL12_MOUSE  | Ccl12 Mcp5                |
| C-C motif chemokine 19                                 | O70460           | CCL19_MOUSE  | Ccl19 Elc Scya19          |
| C-C motif chemokine 2 (MCP-1)                          | P10148           | CCL2_MOUSE   | Ccl2 Je Mcp1              |
| CC chemokine DC/B-CK (Chemokine (C-C motif) ligand 22) | Q54656           | Q54656_MOUSE | Ccl22 DCBCK               |
| C-C motif chemokine 3 (MIP-1-alpha)                    | P10855           | CCL3_MOUSE   | Ccl3 Mip1a Scya3          |
| C-C motif chemokine 4 (MIP-1-beta)                     | P14097           | CCL4_MOUSE   | Ccl4 Mip1b Scya4          |
| C-C motif chemokine 5 (T-cell-specific protein RANTES) | P30882           | CCL5_MOUSE   | Ccl5 Scya5                |
| C-C motif chemokine 7 (MCP-3)                          | Q03366           | CCL7_MOUSE   | Ccl7 Fic Mcp3             |
| C-C motif chemokine 9                                  | P51670           | CCL9_MOUSE   | Ccl9, Mrp2, Scya10, Scya9 |
| Tumor necrosis factor receptor superfamily member 5    | P27512           | TNR5_MOUSE   | Cd40 Tnfrsf5              |
| CD40 ligand                                            | P27548           | CD40L_MOUSE  | Cd40lg Cd40l              |
| C-reactive protein                                     | P14847           | CRP_MOUSE    | Crp Ptx1                  |
| Macrophage colony-stimulating factor 1 (CSF-1)         | P07141           | CSF1_MOUSE   | Csf1 Csfm                 |
| C-X-C motif chemokine 2 (MIP2)                         | P10889           | CXCL2_MOUSE  | Cxcl2 Mip-2 Mip2          |
| Endothelin-1 (ET-1)                                    | P22387           | EDN1_MOUSE   | Edn1                      |
| Epidermal growth factor                                | P01132           | EGF_MOUSE    | Egf                       |
| Tissue factor (TF)                                     | P20352           | TF_MOUSE     | F3 Cf-3 Cf3               |
| Coagulation factor VII                                 | P70375           | FA7_MOUSE    | F7 Cf7                    |
| Fibrinogen, alpha polypeptide (Protein Fga)            | Q99K47           | Q99K47_MOUSE | Fga                       |
| Fibroblast growth factor 2 (FGF-2)                     | P15655           | FGF2_MOUSE   | Fgf2 Fgf-2                |
| Glucagon                                               | P55095           | GLUC_MOUSE   | Gcg                       |
| Somatotropin (Growth hormone)                          | P06880           | SOMA_MOUSE   | Gh1 Gh                    |
| Aspartate aminotransferase, cytoplasmic (cAspAT)       | P05201           | AATC_MOUSE   | Got1                      |
| Haptoglobin                                            | Q61646           | HPT_MOUSE    | Hp                        |
| Interferon gamma (IFN-gamma)                           | P01580           | IFNG_MOUSE   | Ifng                      |
| Immunoglobulin A (IGA)                                 | NA               | NA           | IgA                       |
| Insulin-like growth factor I (IGF-I)                   | P05017           | IGF1_MOUSE   | Igf1 Igf-1                |
| Interleukin-18 (IL-18)                                 | P70380           | IL18_MOUSE   | Il18 Igif                 |
| Interleukin-1 alpha (IL-1 alpha)                       | P01582           | IL1A_MOUSE   | Il1a                      |
| Interleukin-2 (IL-2)                                   | P04351           | IL2_MOUSE    | Il2 Il-2                  |
| Interleukin 5 IL 5                                     | P00441           | IL5_MOUSE    | Il5                       |
| Kit ligand (Stem cell factor)                          | P20826           | SCF_MOUSE    | Kitlg Kitl Mgf Sl Sif     |
| Leukemia inhibitory factor (LIF)                       | P09056           | LIF_MOUSE    | Lif                       |
| Myoglobin                                              | P04247           | MYG_MOUSE    | Mb                        |

|                                                     |        |             |                   |
|-----------------------------------------------------|--------|-------------|-------------------|
| Matrix metalloproteinase-9 (MMP-9)                  | P41245 | MMP9_MOUSE  | Mmp9 Clg4b        |
| Myeloperoxidase (MPO)                               | P11247 | PERM_MOUSE  | Mpo               |
| Luteinizing Hormone                                 | NA     | NA          | NA                |
| Granulocyte Chemotactic protein 2                   | NA     | CXCL6_MOUSE | NA                |
| Testesteron                                         | NA     | NA          | NA                |
| Cortisol                                            | NA     | NA          | NA                |
| Progesterone                                        | NA     | NA          | NA                |
| Adrenocorticotropic hormone (ACTH)                  | P01193 | COLI_MOUSE  | Pomc Pomc2        |
| Prolactin (PRL)                                     | P06879 | PRL_MOUSE   | Prl               |
| Resistin                                            | Q99P87 | RETN_MOUSE  | Retn, Fizz3       |
| Plasminogen activator inhibitor 1 (PAI)             | P22777 | PAI1_MOUSE  | Serpine1 Mr1 Pai1 |
| Thrombopoietin (C-mpl ligand)                       | P40226 | TPO_MOUSE   | Thpo              |
| Metalloproteinase inhibitor 1 (TIMP-1)              | P12032 | TIMP1_MOUSE | Timp1 Timp-1      |
| Vascular cell adhesion protein 1 (V-CAM 1)          | P29533 | VCAM1_MOUSE | Vcam1 Vcam-1      |
| Vascular endothelial growth factor A (VEGF-A)_MOUSE | Q00731 | VEGFA_MOUSE | Vegfa Vegf        |
| von Willebrand factor (vWF)                         | Q8CIZ8 | VWF_MOUSE   | Vwf               |
| Lymphotactin (C motif chemokine 1)                  | P47993 | XCL1_MOUSE  | Xcl1 Lptn Ltn     |
