# Supplementary material for: System-based proteomic and metabonomic analysis of the Df(16)A+/− mouse identifies potential miR-185 targets and molecular pathway alterations
Source: PubMed Central journal article supplement — Mol Psychiatry. 2016 Mar 22;22(3):384–95. doi: 10.1038/mp.2016.27 (PMC5322275; doi:10.1038/mp.2016.27), 2016-03-22
Supplement: mp201627x2.pdf [file mp201627x2.pdf]

**Supplementary Table S2: List of transitions measured in label-based SRM**

| Uniprot Protein ID | Peptide Sequence | Precursor Charge | Fragment Ion | Product Charge | Isotope Label |
|--------------------|------------------|------------------|--------------|----------------|---------------|
| A4_MOUSE           | VESLEQEAAANER    | 2                | y8           | 1              | light         |
| A4_MOUSE           | VESLEQEAAANER    | 2                | y7           | 1              | light         |
| A4_MOUSE           | VESLEQEAAANER    | 2                | y5           | 1              | light         |
| A4_MOUSE           | VESLEQEAAANER    | 2                | y4           | 1              | light         |
| A4_MOUSE           | VESLEQEAAANER    | 2                | y3           | 1              | light         |
| A4_MOUSE           | VESLEQEAAANER    | 2                | y10          | 2              | light         |
| A4_MOUSE           | VESLEQEAAANER    | 2                | y8           | 1              | heavy         |
| A4_MOUSE           | VESLEQEAAANER    | 2                | y7           | 1              | heavy         |
| A4_MOUSE           | VESLEQEAAANER    | 2                | y5           | 1              | heavy         |
| A4_MOUSE           | VESLEQEAAANER    | 2                | y4           | 1              | heavy         |
| A4_MOUSE           | VESLEQEAAANER    | 2                | y3           | 1              | heavy         |
| A4_MOUSE           | VESLEQEAAANER    | 2                | y10          | 2              | heavy         |
| ADA10_MOUSE        | GGTFYIEPAER      | 2                | y7           | 1              | light         |
| ADA10_MOUSE        | GGTFYIEPAER      | 2                | y5           | 1              | light         |
| ADA10_MOUSE        | GGTFYIEPAER      | 2                | b6           | 1              | light         |
| ADA10_MOUSE        | GGTFYIEPAER      | 2                | b7           | 1              | light         |
| ADA10_MOUSE        | GGTFYIEPAER      | 2                | y7           | 1              | heavy         |
| ADA10_MOUSE        | GGTFYIEPAER      | 2                | y5           | 1              | heavy         |
| ADA10_MOUSE        | GGTFYIEPAER      | 2                | b6           | 1              | heavy         |
| ADA10_MOUSE        | GGTFYIEPAER      | 2                | b7           | 1              | heavy         |
| ADA10_MOUSE        | AIDTIYQTDFSGIR   | 2                | y8           | 1              | light         |
| ADA10_MOUSE        | AIDTIYQTDFSGIR   | 2                | y6           | 1              | light         |
| ADA10_MOUSE        | AIDTIYQTDFSGIR   | 2                | y14          | 2              | light         |
| ADA10_MOUSE        | AIDTIYQTDFSGIR   | 2                | b5           | 1              | light         |
| ADA10_MOUSE        | AIDTIYQTDFSGIR   | 2                | y8           | 1              | heavy         |
| ADA10_MOUSE        | AIDTIYQTDFSGIR   | 2                | y6           | 1              | heavy         |
| ADA10_MOUSE        | AIDTIYQTDFSGIR   | 2                | y14          | 2              | heavy         |
| ADA10_MOUSE        | AIDTIYQTDFSGIR   | 2                | b5           | 1              | heavy         |
| ADA10_MOUSE        | FPNIGVEK         | 2                | y6           | 1              | light         |
| ADA10_MOUSE        | FPNIGVEK         | 2                | y2           | 1              | light         |
| ADA10_MOUSE        | FPNIGVEK         | 2                | y7           | 2              | light         |
| ADA10_MOUSE        | FPNIGVEK         | 2                | b2           | 1              | light         |
| ADA10_MOUSE        | FPNIGVEK         | 2                | b3           | 1              | light         |
| ADA10_MOUSE        | FPNIGVEK         | 2                | y6           | 1              | heavy         |
| ADA10_MOUSE        | FPNIGVEK         | 2                | y2           | 1              | heavy         |
| ADA10_MOUSE        | FPNIGVEK         | 2                | y7           | 2              | heavy         |
| ADA10_MOUSE        | FPNIGVEK         | 2                | b2           | 1              | heavy         |
| ADA10_MOUSE        | FPNIGVEK         | 2                | b3           | 1              | heavy         |
| ADA10_MOUSE        | TITLQPGSPCNDFR   | 2                | y11          | 1              | light         |
| ADA10_MOUSE        | TITLQPGSPCNDFR   | 2                | y6           | 1              | light         |
| ADA10_MOUSE        | TITLQPGSPCNDFR   | 2                | y9           | 2              | light         |

|             |                  |   |     |   |       |
|-------------|------------------|---|-----|---|-------|
| ADA10_MOUSE | TITLQPGSPCNDFR   | 2 | b5  | 1 | light |
| ADA10_MOUSE | TITLQPGSPCNDFR   | 2 | b8  | 1 | light |
| ADA10_MOUSE | TITLQPGSPCNDFR   | 2 | b11 | 1 | light |
| ADA10_MOUSE | TITLQPGSPCNDFR   | 2 | b8  | 2 | light |
| ADA10_MOUSE | TITLQPGSPCNDFR   | 2 | y11 | 1 | heavy |
| ADA10_MOUSE | TITLQPGSPCNDFR   | 2 | y6  | 1 | heavy |
| ADA10_MOUSE | TITLQPGSPCNDFR   | 2 | y9  | 2 | heavy |
| ADA10_MOUSE | TITLQPGSPCNDFR   | 2 | b5  | 1 | heavy |
| ADA10_MOUSE | TITLQPGSPCNDFR   | 2 | b8  | 1 | heavy |
| ADA10_MOUSE | TITLQPGSPCNDFR   | 2 | b11 | 1 | heavy |
| ADA10_MOUSE | TITLQPGSPCNDFR   | 2 | b8  | 2 | heavy |
| AINX_MOUSE  | ALEAELAALR       | 2 | y7  | 1 | light |
| AINX_MOUSE  | ALEAELAALR       | 2 | y6  | 1 | light |
| AINX_MOUSE  | ALEAELAALR       | 2 | y5  | 1 | light |
| AINX_MOUSE  | ALEAELAALR       | 2 | y4  | 1 | light |
| AINX_MOUSE  | ALEAELAALR       | 2 | y7  | 1 | heavy |
| AINX_MOUSE  | ALEAELAALR       | 2 | y6  | 1 | heavy |
| AINX_MOUSE  | ALEAELAALR       | 2 | y5  | 1 | heavy |
| AINX_MOUSE  | ALEAELAALR       | 2 | y4  | 1 | heavy |
| AINX_MOUSE  | DGLAEVQR         | 2 | y6  | 1 | light |
| AINX_MOUSE  | DGLAEVQR         | 2 | y5  | 1 | light |
| AINX_MOUSE  | DGLAEVQR         | 2 | y4  | 1 | light |
| AINX_MOUSE  | DGLAEVQR         | 2 | y2  | 1 | light |
| AINX_MOUSE  | DGLAEVQR         | 2 | y6  | 1 | heavy |
| AINX_MOUSE  | DGLAEVQR         | 2 | y5  | 1 | heavy |
| AINX_MOUSE  | DGLAEVQR         | 2 | y4  | 1 | heavy |
| AINX_MOUSE  | DGLAEVQR         | 2 | y2  | 1 | heavy |
| ANFY1_MOUSE | NGWSLLHK         | 2 | y6  | 1 | light |
| ANFY1_MOUSE | NGWSLLHK         | 2 | y5  | 1 | light |
| ANFY1_MOUSE | NGWSLLHK         | 2 | y4  | 1 | light |
| ANFY1_MOUSE | NGWSLLHK         | 2 | b5  | 1 | light |
| ANFY1_MOUSE | NGWSLLHK         | 2 | b6  | 1 | light |
| ANFY1_MOUSE | NGWSLLHK         | 2 | b7  | 1 | light |
| ANFY1_MOUSE | NGWSLLHK         | 2 | y6  | 1 | heavy |
| ANFY1_MOUSE | NGWSLLHK         | 2 | y5  | 1 | heavy |
| ANFY1_MOUSE | NGWSLLHK         | 2 | y4  | 1 | heavy |
| ANFY1_MOUSE | NGWSLLHK         | 2 | b5  | 1 | heavy |
| ANFY1_MOUSE | NGWSLLHK         | 2 | b6  | 1 | heavy |
| ANFY1_MOUSE | NGWSLLHK         | 2 | b7  | 1 | heavy |
| ANFY1_MOUSE | ALLTECTVDAEAFNLR | 2 | y11 | 1 | light |
| ANFY1_MOUSE | ALLTECTVDAEAFNLR | 2 | y10 | 1 | light |
| ANFY1_MOUSE | ALLTECTVDAEAFNLR | 2 | y8  | 1 | light |
| ANFY1_MOUSE | ALLTECTVDAEAFNLR | 2 | y7  | 1 | light |
| ANFY1_MOUSE | ALLTECTVDAEAFNLR | 2 | y6  | 1 | light |

|             |                  |   |     |   |       |
|-------------|------------------|---|-----|---|-------|
| ANFY1_MOUSE | ALLTECTVDAEAFNLR | 2 | y5  | 1 | light |
| ANFY1_MOUSE | ALLTECTVDAEAFNLR | 2 | y4  | 1 | light |
| ANFY1_MOUSE | ALLTECTVDAEAFNLR | 2 | y3  | 1 | light |
| ANFY1_MOUSE | ALLTECTVDAEAFNLR | 2 | y11 | 1 | heavy |
| ANFY1_MOUSE | ALLTECTVDAEAFNLR | 2 | y10 | 1 | heavy |
| ANFY1_MOUSE | ALLTECTVDAEAFNLR | 2 | y8  | 1 | heavy |
| ANFY1_MOUSE | ALLTECTVDAEAFNLR | 2 | y7  | 1 | heavy |
| ANFY1_MOUSE | ALLTECTVDAEAFNLR | 2 | y6  | 1 | heavy |
| ANFY1_MOUSE | ALLTECTVDAEAFNLR | 2 | y5  | 1 | heavy |
| ANFY1_MOUSE | ALLTECTVDAEAFNLR | 2 | y4  | 1 | heavy |
| ANFY1_MOUSE | ALLTECTVDAEAFNLR | 2 | y3  | 1 | heavy |
| COMT_MOUSE  | EWAMNVGDAK       | 2 | y8  | 1 | light |
| COMT_MOUSE  | EWAMNVGDAK       | 2 | y7  | 1 | light |
| COMT_MOUSE  | EWAMNVGDAK       | 2 | y6  | 1 | light |
| COMT_MOUSE  | EWAMNVGDAK       | 2 | y5  | 1 | light |
| COMT_MOUSE  | EWAMNVGDAK       | 2 | y3  | 1 | light |
| COMT_MOUSE  | EWAMNVGDAK       | 2 | y2  | 1 | light |
| COMT_MOUSE  | EWAMNVGDAK       | 2 | y8  | 1 | heavy |
| COMT_MOUSE  | EWAMNVGDAK       | 2 | y7  | 1 | heavy |
| COMT_MOUSE  | EWAMNVGDAK       | 2 | y6  | 1 | heavy |
| COMT_MOUSE  | EWAMNVGDAK       | 2 | y5  | 1 | heavy |
| COMT_MOUSE  | EWAMNVGDAK       | 2 | y3  | 1 | heavy |
| COMT_MOUSE  | EWAMNVGDAK       | 2 | y2  | 1 | heavy |
| COMT_MOUSE  | AVYQGPSSPVK      | 2 | y10 | 1 | light |
| COMT_MOUSE  | AVYQGPSSPVK      | 2 | y9  | 1 | light |
| COMT_MOUSE  | AVYQGPSSPVK      | 2 | y8  | 1 | light |
| COMT_MOUSE  | AVYQGPSSPVK      | 2 | y7  | 1 | light |
| COMT_MOUSE  | AVYQGPSSPVK      | 2 | y4  | 1 | light |
| COMT_MOUSE  | AVYQGPSSPVK      | 2 | y3  | 1 | light |
| COMT_MOUSE  | AVYQGPSSPVK      | 2 | b4  | 1 | light |
| COMT_MOUSE  | AVYQGPSSPVK      | 2 | b5  | 1 | light |
| COMT_MOUSE  | AVYQGPSSPVK      | 2 | b9  | 1 | light |
| COMT_MOUSE  | AVYQGPSSPVK      | 2 | y10 | 1 | heavy |
| COMT_MOUSE  | AVYQGPSSPVK      | 2 | y9  | 1 | heavy |
| COMT_MOUSE  | AVYQGPSSPVK      | 2 | y8  | 1 | heavy |
| COMT_MOUSE  | AVYQGPSSPVK      | 2 | y7  | 1 | heavy |
| COMT_MOUSE  | AVYQGPSSPVK      | 2 | y4  | 1 | heavy |
| COMT_MOUSE  | AVYQGPSSPVK      | 2 | y3  | 1 | heavy |
| COMT_MOUSE  | AVYQGPSSPVK      | 2 | b4  | 1 | heavy |
| COMT_MOUSE  | AVYQGPSSPVK      | 2 | b5  | 1 | heavy |
| COMT_MOUSE  | AVYQGPSSPVK      | 2 | b9  | 1 | heavy |
| DLG4_MOUSE  | ANDDLLSEFPDK     | 2 | y7  | 1 | light |
| DLG4_MOUSE  | ANDDLLSEFPDK     | 2 | y6  | 1 | light |
| DLG4_MOUSE  | ANDDLLSEFPDK     | 2 | y5  | 1 | light |

|             |                 |   |     |   |       |
|-------------|-----------------|---|-----|---|-------|
| DLG4_MOUSE  | ANDDLSEFPDK     | 2 | y4  | 1 | light |
| DLG4_MOUSE  | ANDDLSEFPDK     | 2 | y3  | 1 | light |
| DLG4_MOUSE  | ANDDLSEFPDK     | 2 | b5  | 1 | light |
| DLG4_MOUSE  | ANDDLSEFPDK     | 2 | y7  | 1 | heavy |
| DLG4_MOUSE  | ANDDLSEFPDK     | 2 | y6  | 1 | heavy |
| DLG4_MOUSE  | ANDDLSEFPDK     | 2 | y5  | 1 | heavy |
| DLG4_MOUSE  | ANDDLSEFPDK     | 2 | y4  | 1 | heavy |
| DLG4_MOUSE  | ANDDLSEFPDK     | 2 | y3  | 1 | heavy |
| DLG4_MOUSE  | ANDDLSEFPDK     | 2 | b5  | 1 | heavy |
| DLG4_MOUSE  | SENVLEINK       | 2 | y8  | 1 | light |
| DLG4_MOUSE  | SENVLEINK       | 2 | y7  | 1 | light |
| DLG4_MOUSE  | SENVLEINK       | 2 | y5  | 1 | light |
| DLG4_MOUSE  | SENVLEINK       | 2 | y4  | 1 | light |
| DLG4_MOUSE  | SENVLEINK       | 2 | y3  | 1 | light |
| DLG4_MOUSE  | SENVLEINK       | 2 | y8  | 1 | heavy |
| DLG4_MOUSE  | SENVLEINK       | 2 | y7  | 1 | heavy |
| DLG4_MOUSE  | SENVLEINK       | 2 | y5  | 1 | heavy |
| DLG4_MOUSE  | SENVLEINK       | 2 | y4  | 1 | heavy |
| DLG4_MOUSE  | SENVLEINK       | 2 | y3  | 1 | heavy |
| GRIA1_MOUSE | ADVAVPLTITLVR   | 2 | y10 | 1 | light |
| GRIA1_MOUSE | ADVAVPLTITLVR   | 2 | y9  | 1 | light |
| GRIA1_MOUSE | ADVAVPLTITLVR   | 2 | y8  | 1 | light |
| GRIA1_MOUSE | ADVAVPLTITLVR   | 2 | y6  | 1 | light |
| GRIA1_MOUSE | ADVAVPLTITLVR   | 2 | b5  | 1 | light |
| GRIA1_MOUSE | ADVAVPLTITLVR   | 2 | b6  | 1 | light |
| GRIA1_MOUSE | ADVAVPLTITLVR   | 2 | y10 | 1 | heavy |
| GRIA1_MOUSE | ADVAVPLTITLVR   | 2 | y9  | 1 | heavy |
| GRIA1_MOUSE | ADVAVPLTITLVR   | 2 | y8  | 1 | heavy |
| GRIA1_MOUSE | ADVAVPLTITLVR   | 2 | y6  | 1 | heavy |
| GRIA1_MOUSE | ADVAVPLTITLVR   | 2 | b5  | 1 | heavy |
| GRIA1_MOUSE | ADVAVPLTITLVR   | 2 | b6  | 1 | heavy |
| GRIA1_MOUSE | GFCLIPQQSINEAIR | 2 | y11 | 1 | light |
| GRIA1_MOUSE | GFCLIPQQSINEAIR | 2 | y10 | 1 | light |
| GRIA1_MOUSE | GFCLIPQQSINEAIR | 2 | y7  | 1 | light |
| GRIA1_MOUSE | GFCLIPQQSINEAIR | 2 | y6  | 1 | light |
| GRIA1_MOUSE | GFCLIPQQSINEAIR | 2 | y5  | 1 | light |
| GRIA1_MOUSE | GFCLIPQQSINEAIR | 2 | b4  | 1 | light |
| GRIA1_MOUSE | GFCLIPQQSINEAIR | 2 | b5  | 1 | light |
| GRIA1_MOUSE | GFCLIPQQSINEAIR | 2 | y11 | 1 | heavy |
| GRIA1_MOUSE | GFCLIPQQSINEAIR | 2 | y10 | 1 | heavy |
| GRIA1_MOUSE | GFCLIPQQSINEAIR | 2 | y9  | 1 | heavy |
| GRIA1_MOUSE | GFCLIPQQSINEAIR | 2 | y7  | 1 | heavy |
| GRIA1_MOUSE | GFCLIPQQSINEAIR | 2 | y6  | 1 | heavy |
| GRIA1_MOUSE | GFCLIPQQSINEAIR | 2 | y5  | 1 | heavy |

|             |                 |   |     |   |       |
|-------------|-----------------|---|-----|---|-------|
| GRIA1_MOUSE | GFCLIPQQSINEAIR | 2 | b4  | 1 | heavy |
| GRIA1_MOUSE | GFCLIPQQSINEAIR | 2 | b5  | 1 | heavy |
| GRIA2_MOUSE | ADIAIAPLTITLVR  | 2 | y10 | 1 | light |
| GRIA2_MOUSE | ADIAIAPLTITLVR  | 2 | y9  | 1 | light |
| GRIA2_MOUSE | ADIAIAPLTITLVR  | 2 | y8  | 1 | light |
| GRIA2_MOUSE | ADIAIAPLTITLVR  | 2 | b5  | 1 | light |
| GRIA2_MOUSE | ADIAIAPLTITLVR  | 2 | b6  | 1 | light |
| GRIA2_MOUSE | ADIAIAPLTITLVR  | 2 | y10 | 1 | heavy |
| GRIA2_MOUSE | ADIAIAPLTITLVR  | 2 | y9  | 1 | heavy |
| GRIA2_MOUSE | ADIAIAPLTITLVR  | 2 | y8  | 1 | heavy |
| GRIA2_MOUSE | ADIAIAPLTITLVR  | 2 | b5  | 1 | heavy |
| GRIA2_MOUSE | ADIAIAPLTITLVR  | 2 | b6  | 1 | heavy |
| GRIA2_MOUSE | EGYNVYGIESVK    | 2 | y7  | 1 | light |
| GRIA2_MOUSE | EGYNVYGIESVK    | 2 | y6  | 1 | light |
| GRIA2_MOUSE | EGYNVYGIESVK    | 2 | y4  | 1 | light |
| GRIA2_MOUSE | EGYNVYGIESVK    | 2 | y7  | 1 | heavy |
| GRIA2_MOUSE | EGYNVYGIESVK    | 2 | y6  | 1 | heavy |
| GRIA2_MOUSE | EGYNVYGIESVK    | 2 | y4  | 1 | heavy |
| GRIA2_MOUSE | FAYLYDSDR       | 2 | b2  | 1 | light |
| GRIA2_MOUSE | FAYLYDSDR       | 2 | b3  | 1 | light |
| GRIA2_MOUSE | FAYLYDSDR       | 2 | b4  | 1 | light |
| GRIA2_MOUSE | FAYLYDSDR       | 2 | y7  | 1 | light |
| GRIA2_MOUSE | FAYLYDSDR       | 2 | y6  | 1 | light |
| GRIA2_MOUSE | FAYLYDSDR       | 2 | y5  | 1 | light |
| GRIA2_MOUSE | FAYLYDSDR       | 2 | y4  | 1 | light |
| GRIA2_MOUSE | FAYLYDSDR       | 2 | y3  | 1 | light |
| GRIA2_MOUSE | FAYLYDSDR       | 2 | y7  | 2 | light |
| GRIA2_MOUSE | FAYLYDSDR       | 2 | b2  | 1 | heavy |
| GRIA2_MOUSE | FAYLYDSDR       | 2 | b3  | 1 | heavy |
| GRIA2_MOUSE | FAYLYDSDR       | 2 | b4  | 1 | heavy |
| GRIA2_MOUSE | FAYLYDSDR       | 2 | y7  | 1 | heavy |
| GRIA2_MOUSE | FAYLYDSDR       | 2 | y6  | 1 | heavy |
| GRIA2_MOUSE | FAYLYDSDR       | 2 | y5  | 1 | heavy |
| GRIA2_MOUSE | FAYLYDSDR       | 2 | y4  | 1 | heavy |
| GRIA2_MOUSE | FAYLYDSDR       | 2 | y3  | 1 | heavy |
| GRIA2_MOUSE | FAYLYDSDR       | 2 | y7  | 2 | heavy |
| GRIA2_MOUSE | GLSTLQAVLDSAAEK | 2 | y10 | 1 | light |
| GRIA2_MOUSE | GLSTLQAVLDSAAEK | 2 | y9  | 1 | light |
| GRIA2_MOUSE | GLSTLQAVLDSAAEK | 2 | y8  | 1 | light |
| GRIA2_MOUSE | GLSTLQAVLDSAAEK | 2 | y7  | 1 | light |
| GRIA2_MOUSE | GLSTLQAVLDSAAEK | 2 | y6  | 1 | light |
| GRIA2_MOUSE | GLSTLQAVLDSAAEK | 2 | y5  | 1 | light |
| GRIA2_MOUSE | GLSTLQAVLDSAAEK | 2 | y10 | 1 | heavy |
| GRIA2_MOUSE | GLSTLQAVLDSAAEK | 2 | y9  | 1 | heavy |

|             |                 |   |     |   |       |
|-------------|-----------------|---|-----|---|-------|
| GRIA2_MOUSE | GLSTLQAVLDSAAEK | 2 | y8  | 1 | heavy |
| GRIA2_MOUSE | GLSTLQAVLDSAAEK | 2 | y7  | 1 | heavy |
| GRIA2_MOUSE | GLSTLQAVLDSAAEK | 2 | y6  | 1 | heavy |
| GRIA2_MOUSE | GLSTLQAVLDSAAEK | 2 | y5  | 1 | heavy |
| GRIA3_MOUSE | ADIAVAPLTITLVR  | 2 | y10 | 1 | light |
| GRIA3_MOUSE | ADIAVAPLTITLVR  | 2 | y9  | 1 | light |
| GRIA3_MOUSE | ADIAVAPLTITLVR  | 2 | y8  | 1 | light |
| GRIA3_MOUSE | ADIAVAPLTITLVR  | 2 | b5  | 1 | light |
| GRIA3_MOUSE | ADIAVAPLTITLVR  | 2 | y10 | 1 | heavy |
| GRIA3_MOUSE | ADIAVAPLTITLVR  | 2 | y9  | 1 | heavy |
| GRIA3_MOUSE | ADIAVAPLTITLVR  | 2 | y8  | 1 | heavy |
| GRIA3_MOUSE | ADIAVAPLTITLVR  | 2 | b5  | 1 | heavy |
| GSK3B_MOUSE | QTLPIYVK        | 2 | b2  | 1 | light |
| GSK3B_MOUSE | QTLPIYVK        | 2 | b3  | 1 | light |
| GSK3B_MOUSE | QTLPIYVK        | 2 | y7  | 1 | light |
| GSK3B_MOUSE | QTLPIYVK        | 2 | y6  | 1 | light |
| GSK3B_MOUSE | QTLPIYVK        | 2 | y2  | 1 | light |
| GSK3B_MOUSE | QTLPIYVK        | 2 | y7  | 2 | light |
| GSK3B_MOUSE | QTLPIYVK        | 2 | y6  | 2 | light |
| GSK3B_MOUSE | QTLPIYVK        | 2 | b2  | 1 | heavy |
| GSK3B_MOUSE | QTLPIYVK        | 2 | b3  | 1 | heavy |
| GSK3B_MOUSE | QTLPIYVK        | 2 | y7  | 1 | heavy |
| GSK3B_MOUSE | QTLPIYVK        | 2 | y6  | 1 | heavy |
| GSK3B_MOUSE | QTLPIYVK        | 2 | y2  | 1 | heavy |
| GSK3B_MOUSE | QTLPIYVK        | 2 | y7  | 2 | heavy |
| GSK3B_MOUSE | QTLPIYVK        | 2 | y6  | 2 | heavy |
| GSK3B_MOUSE | TPPEAIALCSR     | 2 | b5  | 1 | light |
| GSK3B_MOUSE | TPPEAIALCSR     | 2 | y9  | 1 | light |
| GSK3B_MOUSE | TPPEAIALCSR     | 2 | y7  | 1 | light |
| GSK3B_MOUSE | TPPEAIALCSR     | 2 | y6  | 1 | light |
| GSK3B_MOUSE | TPPEAIALCSR     | 2 | y4  | 1 | light |
| GSK3B_MOUSE | TPPEAIALCSR     | 2 | y3  | 1 | light |
| GSK3B_MOUSE | TPPEAIALCSR     | 2 | y10 | 2 | light |
| GSK3B_MOUSE | TPPEAIALCSR     | 2 | y9  | 2 | light |
| GSK3B_MOUSE | TPPEAIALCSR     | 2 | b5  | 1 | heavy |
| GSK3B_MOUSE | TPPEAIALCSR     | 2 | y9  | 1 | heavy |
| GSK3B_MOUSE | TPPEAIALCSR     | 2 | y7  | 1 | heavy |
| GSK3B_MOUSE | TPPEAIALCSR     | 2 | y6  | 1 | heavy |
| GSK3B_MOUSE | TPPEAIALCSR     | 2 | y4  | 1 | heavy |
| GSK3B_MOUSE | TPPEAIALCSR     | 2 | y3  | 1 | heavy |
| GSK3B_MOUSE | TPPEAIALCSR     | 2 | y10 | 2 | heavy |
| GSK3B_MOUSE | TPPEAIALCSR     | 2 | y9  | 2 | heavy |
| GSK3B_MOUSE | LLEYTP TAR      | 2 | b2  | 1 | light |
| GSK3B_MOUSE | LLEYTP TAR      | 2 | b3  | 1 | light |

|             |                     |   |    |   |       |
|-------------|---------------------|---|----|---|-------|
| GSK3B_MOUSE | LLEYTP TAR          | 2 | y7 | 1 | light |
| GSK3B_MOUSE | LLEYTP TAR          | 2 | y6 | 1 | light |
| GSK3B_MOUSE | LLEYTP TAR          | 2 | y5 | 1 | light |
| GSK3B_MOUSE | LLEYTP TAR          | 2 | y4 | 1 | light |
| GSK3B_MOUSE | LLEYTP TAR          | 2 | b2 | 1 | heavy |
| GSK3B_MOUSE | LLEYTP TAR          | 2 | b3 | 1 | heavy |
| GSK3B_MOUSE | LLEYTP TAR          | 2 | y7 | 1 | heavy |
| GSK3B_MOUSE | LLEYTP TAR          | 2 | y6 | 1 | heavy |
| GSK3B_MOUSE | LLEYTP TAR          | 2 | y5 | 1 | heavy |
| GSK3B_MOUSE | LLEYTP TAR          | 2 | y4 | 1 | heavy |
| HPRT_MOUSE  | NVLIVEDI DTGK       | 2 | y9 | 1 | light |
| HPRT_MOUSE  | NVLIVEDI DTGK       | 2 | y8 | 1 | light |
| HPRT_MOUSE  | NVLIVEDI DTGK       | 2 | y4 | 1 | light |
| HPRT_MOUSE  | NVLIVEDI DTGK       | 2 | b4 | 1 | light |
| HPRT_MOUSE  | NVLIVEDI DTGK       | 2 | y9 | 1 | heavy |
| HPRT_MOUSE  | NVLIVEDI DTGK       | 2 | y8 | 1 | heavy |
| HPRT_MOUSE  | NVLIVEDI DTGK       | 2 | y4 | 1 | heavy |
| HPRT_MOUSE  | NVLIVEDI DTGK       | 2 | b4 | 1 | heavy |
| HPRT_MOUSE  | TMQTLLSLVK          | 2 | y8 | 1 | light |
| HPRT_MOUSE  | TMQTLLSLVK          | 2 | y7 | 1 | light |
| HPRT_MOUSE  | TMQTLLSLVK          | 2 | y6 | 1 | light |
| HPRT_MOUSE  | TMQTLLSLVK          | 2 | y5 | 1 | light |
| HPRT_MOUSE  | TMQTLLSLVK          | 2 | y4 | 1 | light |
| HPRT_MOUSE  | TMQTLLSLVK          | 2 | b2 | 1 | light |
| HPRT_MOUSE  | TMQTLLSLVK          | 2 | y8 | 1 | heavy |
| HPRT_MOUSE  | TMQTLLSLVK          | 2 | y7 | 1 | heavy |
| HPRT_MOUSE  | TMQTLLSLVK          | 2 | y6 | 1 | heavy |
| HPRT_MOUSE  | TMQTLLSLVK          | 2 | y5 | 1 | heavy |
| HPRT_MOUSE  | TMQTLLSLVK          | 2 | y4 | 1 | heavy |
| HPRT_MOUSE  | TMQTLLSLVK          | 2 | b2 | 1 | heavy |
| KCC2A_MOUSE | AGAYDFPSPEWDTVTPEAK | 2 | y5 | 1 | light |
| KCC2A_MOUSE | AGAYDFPSPEWDTVTPEAK | 2 | y4 | 1 | light |
| KCC2A_MOUSE | AGAYDFPSPEWDTVTPEAK | 2 | b6 | 1 | light |
| KCC2A_MOUSE | AGAYDFPSPEWDTVTPEAK | 2 | y5 | 1 | heavy |
| KCC2A_MOUSE | AGAYDFPSPEWDTVTPEAK | 2 | y4 | 1 | heavy |
| KCC2A_MOUSE | AGAYDFPSPEWDTVTPEAK | 2 | b6 | 1 | heavy |
| KCC2A_MOUSE | FYFENLSWR           | 2 | y7 | 1 | light |
| KCC2A_MOUSE | FYFENLSWR           | 2 | y6 | 1 | light |
| KCC2A_MOUSE | FYFENLSWR           | 2 | y5 | 1 | light |
| KCC2A_MOUSE | FYFENLSWR           | 2 | y3 | 1 | light |
| KCC2A_MOUSE | FYFENLSWR           | 2 | y2 | 1 | light |
| KCC2A_MOUSE | FYFENLSWR           | 2 | b2 | 1 | light |
| KCC2A_MOUSE | FYFENLSWR           | 2 | y7 | 1 | heavy |
| KCC2A_MOUSE | FYFENLSWR           | 2 | y6 | 1 | heavy |

|             |              |   |     |   |       |
|-------------|--------------|---|-----|---|-------|
| KCC2A_MOUSE | FYFENLSR     | 2 | y5  | 1 | heavy |
| KCC2A_MOUSE | FYFENLSR     | 2 | y3  | 1 | heavy |
| KCC2A_MOUSE | FYFENLSR     | 2 | y2  | 1 | heavy |
| KCC2A_MOUSE | FYFENLSR     | 2 | b2  | 1 | heavy |
| KCC2G_MOUSE | FYFENLLSK    | 2 | b2  | 1 | light |
| KCC2G_MOUSE | FYFENLLSK    | 2 | y8  | 1 | light |
| KCC2G_MOUSE | FYFENLLSK    | 2 | y7  | 1 | light |
| KCC2G_MOUSE | FYFENLLSK    | 2 | y6  | 1 | light |
| KCC2G_MOUSE | FYFENLLSK    | 2 | y3  | 1 | light |
| KCC2G_MOUSE | FYFENLLSK    | 2 | y2  | 1 | light |
| KCC2G_MOUSE | FYFENLLSK    | 2 | b2  | 1 | heavy |
| KCC2G_MOUSE | FYFENLLSK    | 2 | y8  | 1 | heavy |
| KCC2G_MOUSE | FYFENLLSK    | 2 | y7  | 1 | heavy |
| KCC2G_MOUSE | FYFENLLSK    | 2 | y6  | 1 | heavy |
| KCC2G_MOUSE | FYFENLLSK    | 2 | y3  | 1 | heavy |
| KCC2G_MOUSE | FYFENLLSK    | 2 | y2  | 1 | heavy |
| KDM2A_MOUSE | ILLEELASSDPK | 2 | y11 | 1 | light |
| KDM2A_MOUSE | ILLEELASSDPK | 2 | y10 | 1 | light |
| KDM2A_MOUSE | ILLEELASSDPK | 2 | y9  | 1 | light |
| KDM2A_MOUSE | ILLEELASSDPK | 2 | y8  | 1 | light |
| KDM2A_MOUSE | ILLEELASSDPK | 2 | y7  | 1 | light |
| KDM2A_MOUSE | ILLEELASSDPK | 2 | b6  | 1 | light |
| KDM2A_MOUSE | ILLEELASSDPK | 2 | b7  | 1 | light |
| KDM2A_MOUSE | ILLEELASSDPK | 2 | b8  | 1 | light |
| KDM2A_MOUSE | ILLEELASSDPK | 2 | b9  | 1 | light |
| KDM2A_MOUSE | ILLEELASSDPK | 2 | b10 | 1 | light |
| KDM2A_MOUSE | ILLEELASSDPK | 2 | b11 | 1 | light |
| KDM2A_MOUSE | ILLEELASSDPK | 2 | b10 | 2 | light |
| KDM2A_MOUSE | ILLEELASSDPK | 2 | y11 | 1 | heavy |
| KDM2A_MOUSE | ILLEELASSDPK | 2 | y10 | 1 | heavy |
| KDM2A_MOUSE | ILLEELASSDPK | 2 | y9  | 1 | heavy |
| KDM2A_MOUSE | ILLEELASSDPK | 2 | y8  | 1 | heavy |
| KDM2A_MOUSE | ILLEELASSDPK | 2 | y7  | 1 | heavy |
| KDM2A_MOUSE | ILLEELASSDPK | 2 | b6  | 1 | heavy |
| KDM2A_MOUSE | ILLEELASSDPK | 2 | b7  | 1 | heavy |
| KDM2A_MOUSE | ILLEELASSDPK | 2 | b8  | 1 | heavy |
| KDM2A_MOUSE | ILLEELASSDPK | 2 | b9  | 1 | heavy |
| KDM2A_MOUSE | ILLEELASSDPK | 2 | b10 | 1 | heavy |
| KDM2A_MOUSE | ILLEELASSDPK | 2 | b11 | 1 | heavy |
| KDM2A_MOUSE | ILLEELASSDPK | 2 | b10 | 2 | heavy |
| KDM2A_MOUSE | ELHGTSIVPK   | 2 | y9  | 1 | light |
| KDM2A_MOUSE | ELHGTSIVPK   | 2 | y6  | 1 | light |
| KDM2A_MOUSE | ELHGTSIVPK   | 2 | y5  | 1 | light |
| KDM2A_MOUSE | ELHGTSIVPK   | 2 | b6  | 1 | light |



|             |                  |   |     |   |       |
|-------------|------------------|---|-----|---|-------|
| KDM2A_MOUSE | ELHGTSIVPK       | 2 | b7  | 1 | light |
| KDM2A_MOUSE | ELHGTSIVPK       | 2 | b8  | 1 | light |
| KDM2A_MOUSE | ELHGTSIVPK       | 2 | b9  | 1 | light |
| KDM2A_MOUSE | ELHGTSIVPK       | 2 | y9  | 1 | heavy |
| KDM2A_MOUSE | ELHGTSIVPK       | 2 | y6  | 1 | heavy |
| KDM2A_MOUSE | ELHGTSIVPK       | 2 | y5  | 1 | heavy |
| KDM2A_MOUSE | ELHGTSIVPK       | 2 | b6  | 1 | heavy |
| KDM2A_MOUSE | ELHGTSIVPK       | 2 | b7  | 1 | heavy |
| KDM2A_MOUSE | ELHGTSIVPK       | 2 | b8  | 1 | heavy |
| KDM2A_MOUSE | ELHGTSIVPK       | 2 | b9  | 1 | heavy |
| KDM2A_MOUSE | LAGLDITDATLR     | 2 | y11 | 1 | light |
| KDM2A_MOUSE | LAGLDITDATLR     | 2 | y10 | 1 | light |
| KDM2A_MOUSE | LAGLDITDATLR     | 2 | y9  | 1 | light |
| KDM2A_MOUSE | LAGLDITDATLR     | 2 | y8  | 1 | light |
| KDM2A_MOUSE | LAGLDITDATLR     | 2 | y7  | 1 | light |
| KDM2A_MOUSE | LAGLDITDATLR     | 2 | y6  | 1 | light |
| KDM2A_MOUSE | LAGLDITDATLR     | 2 | b7  | 1 | light |
| KDM2A_MOUSE | LAGLDITDATLR     | 2 | b8  | 1 | light |
| KDM2A_MOUSE | LAGLDITDATLR     | 2 | b9  | 1 | light |
| KDM2A_MOUSE | LAGLDITDATLR     | 2 | b10 | 1 | light |
| KDM2A_MOUSE | LAGLDITDATLR     | 2 | b11 | 1 | light |
| KDM2A_MOUSE | LAGLDITDATLR     | 2 | y11 | 1 | heavy |
| KDM2A_MOUSE | LAGLDITDATLR     | 2 | y10 | 1 | heavy |
| KDM2A_MOUSE | LAGLDITDATLR     | 2 | y9  | 1 | heavy |
| KDM2A_MOUSE | LAGLDITDATLR     | 2 | y8  | 1 | heavy |
| KDM2A_MOUSE | LAGLDITDATLR     | 2 | y7  | 1 | heavy |
| KDM2A_MOUSE | LAGLDITDATLR     | 2 | y6  | 1 | heavy |
| KDM2A_MOUSE | LAGLDITDATLR     | 2 | b7  | 1 | heavy |
| KDM2A_MOUSE | LAGLDITDATLR     | 2 | b8  | 1 | heavy |
| KDM2A_MOUSE | LAGLDITDATLR     | 2 | b9  | 1 | heavy |
| KDM2A_MOUSE | LAGLDITDATLR     | 2 | b10 | 1 | heavy |
| KDM2A_MOUSE | LAGLDITDATLR     | 2 | b11 | 1 | heavy |
| KIF5A_MOUSE | EVLQALEELAVNYDQK | 2 | y10 | 1 | light |
| KIF5A_MOUSE | EVLQALEELAVNYDQK | 2 | y9  | 1 | light |
| KIF5A_MOUSE | EVLQALEELAVNYDQK | 2 | y7  | 1 | light |
| KIF5A_MOUSE | EVLQALEELAVNYDQK | 2 | y5  | 1 | light |
| KIF5A_MOUSE | EVLQALEELAVNYDQK | 2 | y4  | 1 | light |
| KIF5A_MOUSE | EVLQALEELAVNYDQK | 2 | y3  | 1 | light |
| KIF5A_MOUSE | EVLQALEELAVNYDQK | 2 | y10 | 1 | heavy |
| KIF5A_MOUSE | EVLQALEELAVNYDQK | 2 | y9  | 1 | heavy |
| KIF5A_MOUSE | EVLQALEELAVNYDQK | 2 | y7  | 1 | heavy |
| KIF5A_MOUSE | EVLQALEELAVNYDQK | 2 | y5  | 1 | heavy |
| KIF5A_MOUSE | EVLQALEELAVNYDQK | 2 | y4  | 1 | heavy |
| KIF5A_MOUSE | EVLQALEELAVNYDQK | 2 | y3  | 1 | heavy |

|             |                 |   |     |   |       |
|-------------|-----------------|---|-----|---|-------|
| KIF5A_MOUSE | DLSEFSVIVGNGEIK | 2 | y13 | 1 | light |
| KIF5A_MOUSE | DLSEFSVIVGNGEIK | 2 | y12 | 1 | light |
| KIF5A_MOUSE | DLSEFSVIVGNGEIK | 2 | y11 | 1 | light |
| KIF5A_MOUSE | DLSEFSVIVGNGEIK | 2 | y10 | 1 | light |
| KIF5A_MOUSE | DLSEFSVIVGNGEIK | 2 | y9  | 1 | light |
| KIF5A_MOUSE | DLSEFSVIVGNGEIK | 2 | y8  | 1 | light |
| KIF5A_MOUSE | DLSEFSVIVGNGEIK | 2 | b8  | 1 | light |
| KIF5A_MOUSE | DLSEFSVIVGNGEIK | 2 | b9  | 1 | light |
| KIF5A_MOUSE | DLSEFSVIVGNGEIK | 2 | b11 | 1 | light |
| KIF5A_MOUSE | DLSEFSVIVGNGEIK | 2 | b12 | 1 | light |
| KIF5A_MOUSE | DLSEFSVIVGNGEIK | 2 | y13 | 1 | heavy |
| KIF5A_MOUSE | DLSEFSVIVGNGEIK | 2 | y12 | 1 | heavy |
| KIF5A_MOUSE | DLSEFSVIVGNGEIK | 2 | y11 | 1 | heavy |
| KIF5A_MOUSE | DLSEFSVIVGNGEIK | 2 | y10 | 1 | heavy |
| KIF5A_MOUSE | DLSEFSVIVGNGEIK | 2 | y9  | 1 | heavy |
| KIF5A_MOUSE | DLSEFSVIVGNGEIK | 2 | y8  | 1 | heavy |
| KIF5A_MOUSE | DLSEFSVIVGNGEIK | 2 | b8  | 1 | heavy |
| KIF5A_MOUSE | DLSEFSVIVGNGEIK | 2 | b9  | 1 | heavy |
| KIF5A_MOUSE | DLSEFSVIVGNGEIK | 2 | b11 | 1 | heavy |
| KIF5A_MOUSE | DLSEFSVIVGNGEIK | 2 | b12 | 1 | heavy |
| KPCG_MOUSE  | ENVFPGTTTR      | 2 | b3  | 1 | light |
| KPCG_MOUSE  | ENVFPGTTTR      | 2 | y8  | 1 | light |
| KPCG_MOUSE  | ENVFPGTTTR      | 2 | y7  | 1 | light |
| KPCG_MOUSE  | ENVFPGTTTR      | 2 | y6  | 1 | light |
| KPCG_MOUSE  | ENVFPGTTTR      | 2 | y5  | 1 | light |
| KPCG_MOUSE  | ENVFPGTTTR      | 2 | y7  | 2 | light |
| KPCG_MOUSE  | ENVFPGTTTR      | 2 | y6  | 2 | light |
| KPCG_MOUSE  | ENVFPGTTTR      | 2 | b3  | 1 | heavy |
| KPCG_MOUSE  | ENVFPGTTTR      | 2 | y8  | 1 | heavy |
| KPCG_MOUSE  | ENVFPGTTTR      | 2 | y7  | 1 | heavy |
| KPCG_MOUSE  | ENVFPGTTTR      | 2 | y6  | 1 | heavy |
| KPCG_MOUSE  | ENVFPGTTTR      | 2 | y5  | 1 | heavy |
| KPCG_MOUSE  | ENVFPGTTTR      | 2 | y7  | 2 | heavy |
| KPCG_MOUSE  | ENVFPGTTTR      | 2 | y6  | 2 | heavy |
| KPCG_MOUSE  | LGSGPDGEPTIR    | 2 | y8  | 1 | light |
| KPCG_MOUSE  | LGSGPDGEPTIR    | 2 | y6  | 1 | light |
| KPCG_MOUSE  | LGSGPDGEPTIR    | 2 | y4  | 1 | light |
| KPCG_MOUSE  | LGSGPDGEPTIR    | 2 | y10 | 2 | light |
| KPCG_MOUSE  | LGSGPDGEPTIR    | 2 | y9  | 2 | light |
| KPCG_MOUSE  | LGSGPDGEPTIR    | 2 | y8  | 1 | heavy |
| KPCG_MOUSE  | LGSGPDGEPTIR    | 2 | y6  | 1 | heavy |
| KPCG_MOUSE  | LGSGPDGEPTIR    | 2 | y4  | 1 | heavy |
| KPCG_MOUSE  | LGSGPDGEPTIR    | 2 | y10 | 2 | heavy |
| KPCG_MOUSE  | LGSGPDGEPTIR    | 2 | y9  | 2 | heavy |

|            |               |   |     |   |       |
|------------|---------------|---|-----|---|-------|
| KPCG_MOUSE | LSVEVWDWDR    | 2 | y8  | 1 | light |
| KPCG_MOUSE | LSVEVWDWDR    | 2 | y7  | 1 | light |
| KPCG_MOUSE | LSVEVWDWDR    | 2 | y6  | 1 | light |
| KPCG_MOUSE | LSVEVWDWDR    | 2 | y5  | 1 | light |
| KPCG_MOUSE | LSVEVWDWDR    | 2 | y8  | 1 | heavy |
| KPCG_MOUSE | LSVEVWDWDR    | 2 | y7  | 1 | heavy |
| KPCG_MOUSE | LSVEVWDWDR    | 2 | y6  | 1 | heavy |
| KPCG_MOUSE | LSVEVWDWDR    | 2 | y5  | 1 | heavy |
| KPCG_MOUSE | FEACNYPLELYER | 2 | y8  | 1 | light |
| KPCG_MOUSE | FEACNYPLELYER | 2 | y7  | 1 | light |
| KPCG_MOUSE | FEACNYPLELYER | 2 | y5  | 1 | light |
| KPCG_MOUSE | FEACNYPLELYER | 2 | y4  | 1 | light |
| KPCG_MOUSE | FEACNYPLELYER | 2 | y3  | 1 | light |
| KPCG_MOUSE | FEACNYPLELYER | 2 | y11 | 2 | light |
| KPCG_MOUSE | FEACNYPLELYER | 2 | b6  | 1 | light |
| KPCG_MOUSE | FEACNYPLELYER | 2 | y8  | 1 | heavy |
| KPCG_MOUSE | FEACNYPLELYER | 2 | y7  | 1 | heavy |
| KPCG_MOUSE | FEACNYPLELYER | 2 | y5  | 1 | heavy |
| KPCG_MOUSE | FEACNYPLELYER | 2 | y4  | 1 | heavy |
| KPCG_MOUSE | FEACNYPLELYER | 2 | y3  | 1 | heavy |
| KPCG_MOUSE | FEACNYPLELYER | 2 | y11 | 2 | heavy |
| KPCG_MOUSE | FEACNYPLELYER | 2 | b6  | 1 | heavy |
| KPCG_MOUSE | ENVFPGSTTR    | 2 | y7  | 1 | light |
| KPCG_MOUSE | ENVFPGSTTR    | 2 | y6  | 1 | light |
| KPCG_MOUSE | ENVFPGSTTR    | 2 | y6  | 2 | light |
| KPCG_MOUSE | ENVFPGSTTR    | 2 | b4  | 1 | light |
| KPCG_MOUSE | ENVFPGSTTR    | 2 | y7  | 1 | heavy |
| KPCG_MOUSE | ENVFPGSTTR    | 2 | y6  | 1 | heavy |
| KPCG_MOUSE | ENVFPGSTTR    | 2 | y6  | 2 | heavy |
| KPCG_MOUSE | ENVFPGSTTR    | 2 | b4  | 1 | heavy |
| MAP2_MOUSE | ADQGLDFAATK   | 2 | y8  | 1 | light |
| MAP2_MOUSE | ADQGLDFAATK   | 2 | y7  | 1 | light |
| MAP2_MOUSE | ADQGLDFAATK   | 2 | y6  | 1 | light |
| MAP2_MOUSE | ADQGLDFAATK   | 2 | y5  | 1 | light |
| MAP2_MOUSE | ADQGLDFAATK   | 2 | y4  | 1 | light |
| MAP2_MOUSE | ADQGLDFAATK   | 2 | y3  | 1 | light |
| MAP2_MOUSE | ADQGLDFAATK   | 2 | y10 | 2 | light |
| MAP2_MOUSE | ADQGLDFAATK   | 2 | y9  | 2 | light |
| MAP2_MOUSE | ADQGLDFAATK   | 2 | b5  | 1 | light |
| MAP2_MOUSE | ADQGLDFAATK   | 2 | y8  | 1 | heavy |
| MAP2_MOUSE | ADQGLDFAATK   | 2 | y7  | 1 | heavy |
| MAP2_MOUSE | ADQGLDFAATK   | 2 | y6  | 1 | heavy |
| MAP2_MOUSE | ADQGLDFAATK   | 2 | y5  | 1 | heavy |
| MAP2_MOUSE | ADQGLDFAATK   | 2 | y4  | 1 | heavy |

|             |                 |   |     |   |       |
|-------------|-----------------|---|-----|---|-------|
| MAP2_MOUSE  | ADQGLDFAATK     | 2 | y3  | 1 | heavy |
| MAP2_MOUSE  | ADQGLDFAATK     | 2 | y10 | 2 | heavy |
| MAP2_MOUSE  | ADQGLDFAATK     | 2 | y9  | 2 | heavy |
| MAP2_MOUSE  | ADQGLDFAATK     | 2 | b5  | 1 | heavy |
| MAP2_MOUSE  | STELGSDYYELSDSR | 2 | y11 | 1 | light |
| MAP2_MOUSE  | STELGSDYYELSDSR | 2 | y10 | 1 | light |
| MAP2_MOUSE  | STELGSDYYELSDSR | 2 | y8  | 1 | light |
| MAP2_MOUSE  | STELGSDYYELSDSR | 2 | y7  | 1 | light |
| MAP2_MOUSE  | STELGSDYYELSDSR | 2 | y6  | 1 | light |
| MAP2_MOUSE  | STELGSDYYELSDSR | 2 | y5  | 1 | light |
| MAP2_MOUSE  | STELGSDYYELSDSR | 2 | y4  | 1 | light |
| MAP2_MOUSE  | STELGSDYYELSDSR | 2 | y11 | 1 | heavy |
| MAP2_MOUSE  | STELGSDYYELSDSR | 2 | y10 | 1 | heavy |
| MAP2_MOUSE  | STELGSDYYELSDSR | 2 | y8  | 1 | heavy |
| MAP2_MOUSE  | STELGSDYYELSDSR | 2 | y7  | 1 | heavy |
| MAP2_MOUSE  | STELGSDYYELSDSR | 2 | y6  | 1 | heavy |
| MAP2_MOUSE  | STELGSDYYELSDSR | 2 | y5  | 1 | heavy |
| MAP2_MOUSE  | STELGSDYYELSDSR | 2 | y4  | 1 | heavy |
| MBOA5_MOUSE | LATSLGASEQALR   | 2 | y8  | 1 | light |
| MBOA5_MOUSE | LATSLGASEQALR   | 2 | y6  | 1 | light |
| MBOA5_MOUSE | LATSLGASEQALR   | 2 | y5  | 1 | light |
| MBOA5_MOUSE | LATSLGASEQALR   | 2 | y4  | 1 | light |
| MBOA5_MOUSE | LATSLGASEQALR   | 2 | y2  | 1 | light |
| MBOA5_MOUSE | LATSLGASEQALR   | 2 | y11 | 2 | light |
| MBOA5_MOUSE | LATSLGASEQALR   | 2 | b5  | 1 | light |
| MBOA5_MOUSE | LATSLGASEQALR   | 2 | y8  | 1 | heavy |
| MBOA5_MOUSE | LATSLGASEQALR   | 2 | y6  | 1 | heavy |
| MBOA5_MOUSE | LATSLGASEQALR   | 2 | y5  | 1 | heavy |
| MBOA5_MOUSE | LATSLGASEQALR   | 2 | y4  | 1 | heavy |
| MBOA5_MOUSE | LATSLGASEQALR   | 2 | y2  | 1 | heavy |
| MBOA5_MOUSE | LATSLGASEQALR   | 2 | y11 | 2 | heavy |
| MBOA5_MOUSE | LATSLGASEQALR   | 2 | b5  | 1 | heavy |
| MBOA5_MOUSE | GQLTDIPGK       | 2 | y7  | 1 | light |
| MBOA5_MOUSE | GQLTDIPGK       | 2 | y6  | 1 | light |
| MBOA5_MOUSE | GQLTDIPGK       | 2 | y5  | 1 | light |
| MBOA5_MOUSE | GQLTDIPGK       | 2 | y4  | 1 | light |
| MBOA5_MOUSE | GQLTDIPGK       | 2 | y3  | 1 | light |
| MBOA5_MOUSE | GQLTDIPGK       | 2 | b2  | 1 | light |
| MBOA5_MOUSE | GQLTDIPGK       | 2 | b3  | 1 | light |
| MBOA5_MOUSE | GQLTDIPGK       | 2 | b4  | 1 | light |
| MBOA5_MOUSE | GQLTDIPGK       | 2 | b6  | 1 | light |
| MBOA5_MOUSE | GQLTDIPGK       | 2 | y7  | 1 | heavy |
| MBOA5_MOUSE | GQLTDIPGK       | 2 | y6  | 1 | heavy |
| MBOA5_MOUSE | GQLTDIPGK       | 2 | y5  | 1 | heavy |

|             |           |   |    |   |       |
|-------------|-----------|---|----|---|-------|
| MBOA5_MOUSE | GQLTDIPGK | 2 | y4 | 1 | heavy |
| MBOA5_MOUSE | GQLTDIPGK | 2 | y3 | 1 | heavy |
| MBOA5_MOUSE | GQLTDIPGK | 2 | b2 | 1 | heavy |
| MBOA5_MOUSE | GQLTDIPGK | 2 | b3 | 1 | heavy |
| MBOA5_MOUSE | GQLTDIPGK | 2 | b4 | 1 | heavy |
| MBOA5_MOUSE | GQLTDIPGK | 2 | b6 | 1 | heavy |
| MBOA5_MOUSE | VWLFETTPR | 2 | y7 | 1 | light |
| MBOA5_MOUSE | VWLFETTPR | 2 | y6 | 1 | light |
| MBOA5_MOUSE | VWLFETTPR | 2 | y5 | 1 | light |
| MBOA5_MOUSE | VWLFETTPR | 2 | y3 | 1 | light |
| MBOA5_MOUSE | VWLFETTPR | 2 | y2 | 1 | light |
| MBOA5_MOUSE | VWLFETTPR | 2 | b2 | 1 | light |
| MBOA5_MOUSE | VWLFETTPR | 2 | b4 | 1 | light |
| MBOA5_MOUSE | VWLFETTPR | 2 | y7 | 1 | heavy |
| MBOA5_MOUSE | VWLFETTPR | 2 | y6 | 1 | heavy |
| MBOA5_MOUSE | VWLFETTPR | 2 | y5 | 1 | heavy |
| MBOA5_MOUSE | VWLFETTPR | 2 | y3 | 1 | heavy |
| MBOA5_MOUSE | VWLFETTPR | 2 | y2 | 1 | heavy |
| MBOA5_MOUSE | VWLFETTPR | 2 | b2 | 1 | heavy |
| MBOA5_MOUSE | VWLFETTPR | 2 | b4 | 1 | heavy |
| MK01_MOUSE  | GQVFDVGPR | 2 | y7 | 1 | light |
| MK01_MOUSE  | GQVFDVGPR | 2 | y6 | 1 | light |
| MK01_MOUSE  | GQVFDVGPR | 2 | y5 | 1 | light |
| MK01_MOUSE  | GQVFDVGPR | 2 | y4 | 1 | light |
| MK01_MOUSE  | GQVFDVGPR | 2 | y3 | 1 | light |
| MK01_MOUSE  | GQVFDVGPR | 2 | y2 | 1 | light |
| MK01_MOUSE  | GQVFDVGPR | 2 | b3 | 1 | light |
| MK01_MOUSE  | GQVFDVGPR | 2 | y7 | 1 | heavy |
| MK01_MOUSE  | GQVFDVGPR | 2 | y6 | 1 | heavy |
| MK01_MOUSE  | GQVFDVGPR | 2 | y5 | 1 | heavy |
| MK01_MOUSE  | GQVFDVGPR | 2 | y4 | 1 | heavy |
| MK01_MOUSE  | GQVFDVGPR | 2 | y3 | 1 | heavy |
| MK01_MOUSE  | GQVFDVGPR | 2 | y2 | 1 | heavy |
| MK01_MOUSE  | GQVFDVGPR | 2 | b3 | 1 | heavy |
| MK01_MOUSE  | NYLLSLPHK | 2 | y7 | 1 | light |
| MK01_MOUSE  | NYLLSLPHK | 2 | y6 | 1 | light |
| MK01_MOUSE  | NYLLSLPHK | 2 | y5 | 1 | light |
| MK01_MOUSE  | NYLLSLPHK | 2 | y3 | 1 | light |
| MK01_MOUSE  | NYLLSLPHK | 2 | b2 | 1 | light |
| MK01_MOUSE  | NYLLSLPHK | 2 | b3 | 1 | light |
| MK01_MOUSE  | NYLLSLPHK | 2 | b4 | 1 | light |
| MK01_MOUSE  | NYLLSLPHK | 2 | y7 | 1 | heavy |
| MK01_MOUSE  | NYLLSLPHK | 2 | y6 | 1 | heavy |
| MK01_MOUSE  | NYLLSLPHK | 2 | y5 | 1 | heavy |

|            |              |   |     |   |       |
|------------|--------------|---|-----|---|-------|
| MK01_MOUSE | NYLLSLPHK    | 2 | y3  | 1 | heavy |
| MK01_MOUSE | NYLLSLPHK    | 2 | b2  | 1 | heavy |
| MK01_MOUSE | NYLLSLPHK    | 2 | b3  | 1 | heavy |
| MK01_MOUSE | NYLLSLPHK    | 2 | b4  | 1 | heavy |
| MK01_MOUSE | ELIFEETAR    | 2 | y7  | 1 | light |
| MK01_MOUSE | ELIFEETAR    | 2 | y6  | 1 | light |
| MK01_MOUSE | ELIFEETAR    | 2 | y5  | 1 | light |
| MK01_MOUSE | ELIFEETAR    | 2 | y4  | 1 | light |
| MK01_MOUSE | ELIFEETAR    | 2 | y3  | 1 | light |
| MK01_MOUSE | ELIFEETAR    | 2 | b2  | 1 | light |
| MK01_MOUSE | ELIFEETAR    | 2 | b3  | 1 | light |
| MK01_MOUSE | ELIFEETAR    | 2 | y7  | 1 | heavy |
| MK01_MOUSE | ELIFEETAR    | 2 | y6  | 1 | heavy |
| MK01_MOUSE | ELIFEETAR    | 2 | y5  | 1 | heavy |
| MK01_MOUSE | ELIFEETAR    | 2 | y4  | 1 | heavy |
| MK01_MOUSE | ELIFEETAR    | 2 | y3  | 1 | heavy |
| MK01_MOUSE | ELIFEETAR    | 2 | b2  | 1 | heavy |
| MK01_MOUSE | ELIFEETAR    | 2 | b3  | 1 | heavy |
| MK03_MOUSE | NYLQSLPSK    | 2 | b2  | 1 | light |
| MK03_MOUSE | NYLQSLPSK    | 2 | b3  | 1 | light |
| MK03_MOUSE | NYLQSLPSK    | 2 | y7  | 1 | light |
| MK03_MOUSE | NYLQSLPSK    | 2 | y6  | 1 | light |
| MK03_MOUSE | NYLQSLPSK    | 2 | y4  | 1 | light |
| MK03_MOUSE | NYLQSLPSK    | 2 | y3  | 1 | light |
| MK03_MOUSE | NYLQSLPSK    | 2 | b2  | 1 | heavy |
| MK03_MOUSE | NYLQSLPSK    | 2 | b3  | 1 | heavy |
| MK03_MOUSE | NYLQSLPSK    | 2 | y7  | 1 | heavy |
| MK03_MOUSE | NYLQSLPSK    | 2 | y6  | 1 | heavy |
| MK03_MOUSE | NYLQSLPSK    | 2 | y4  | 1 | heavy |
| MK03_MOUSE | NYLQSLPSK    | 2 | y3  | 1 | heavy |
| MK03_MOUSE | ELIFQETAR    | 2 | y6  | 1 | light |
| MK03_MOUSE | ELIFQETAR    | 2 | y5  | 1 | light |
| MK03_MOUSE | ELIFQETAR    | 2 | y4  | 1 | light |
| MK03_MOUSE | ELIFQETAR    | 2 | y3  | 1 | light |
| MK03_MOUSE | ELIFQETAR    | 2 | y7  | 2 | light |
| MK03_MOUSE | ELIFQETAR    | 2 | y6  | 1 | heavy |
| MK03_MOUSE | ELIFQETAR    | 2 | y5  | 1 | heavy |
| MK03_MOUSE | ELIFQETAR    | 2 | y4  | 1 | heavy |
| MK03_MOUSE | ELIFQETAR    | 2 | y3  | 1 | heavy |
| MK03_MOUSE | ELIFQETAR    | 2 | y7  | 2 | heavy |
| MTOR_MOUSE | VLGLLGALDPYK | 2 | y10 | 1 | light |
| MTOR_MOUSE | VLGLLGALDPYK | 2 | y8  | 1 | light |
| MTOR_MOUSE | VLGLLGALDPYK | 2 | y7  | 1 | light |
| MTOR_MOUSE | VLGLLGALDPYK | 2 | y4  | 1 | light |

|            |                    |   |     |   |       |
|------------|--------------------|---|-----|---|-------|
| MTOR_MOUSE | VLGLLGALDPYK       | 2 | y3  | 1 | light |
| MTOR_MOUSE | VLGLLGALDPYK       | 2 | b4  | 1 | light |
| MTOR_MOUSE | VLGLLGALDPYK       | 2 | b5  | 1 | light |
| MTOR_MOUSE | VLGLLGALDPYK       | 2 | y10 | 1 | heavy |
| MTOR_MOUSE | VLGLLGALDPYK       | 2 | y8  | 1 | heavy |
| MTOR_MOUSE | VLGLLGALDPYK       | 2 | y7  | 1 | heavy |
| MTOR_MOUSE | VLGLLGALDPYK       | 2 | y4  | 1 | heavy |
| MTOR_MOUSE | VLGLLGALDPYK       | 2 | y3  | 1 | heavy |
| MTOR_MOUSE | VLGLLGALDPYK       | 2 | b4  | 1 | heavy |
| MTOR_MOUSE | VLGLLGALDPYK       | 2 | b5  | 1 | heavy |
| MTOR_MOUSE | GPTPAILESISINNK    | 2 | y13 | 1 | light |
| MTOR_MOUSE | GPTPAILESISINNK    | 2 | y10 | 1 | light |
| MTOR_MOUSE | GPTPAILESISINNK    | 2 | y9  | 1 | light |
| MTOR_MOUSE | GPTPAILESISINNK    | 2 | y8  | 1 | light |
| MTOR_MOUSE | GPTPAILESISINNK    | 2 | y5  | 1 | light |
| MTOR_MOUSE | GPTPAILESISINNK    | 2 | y13 | 2 | light |
| MTOR_MOUSE | GPTPAILESISINNK    | 2 | y13 | 1 | heavy |
| MTOR_MOUSE | GPTPAILESISINNK    | 2 | y10 | 1 | heavy |
| MTOR_MOUSE | GPTPAILESISINNK    | 2 | y9  | 1 | heavy |
| MTOR_MOUSE | GPTPAILESISINNK    | 2 | y8  | 1 | heavy |
| MTOR_MOUSE | GPTPAILESISINNK    | 2 | y5  | 1 | heavy |
| MTOR_MOUSE | GPTPAILESISINNK    | 2 | y13 | 2 | heavy |
| NCDN_MOUSE | SMIDDTYQCLTAVAGTPR | 2 | y8  | 1 | light |
| NCDN_MOUSE | SMIDDTYQCLTAVAGTPR | 2 | y7  | 1 | light |
| NCDN_MOUSE | SMIDDTYQCLTAVAGTPR | 2 | y6  | 1 | light |
| NCDN_MOUSE | SMIDDTYQCLTAVAGTPR | 2 | y5  | 1 | light |
| NCDN_MOUSE | SMIDDTYQCLTAVAGTPR | 2 | y8  | 1 | heavy |
| NCDN_MOUSE | SMIDDTYQCLTAVAGTPR | 2 | y7  | 1 | heavy |
| NCDN_MOUSE | SMIDDTYQCLTAVAGTPR | 2 | y6  | 1 | heavy |
| NCDN_MOUSE | SMIDDTYQCLTAVAGTPR | 2 | y5  | 1 | heavy |
| NCDN_MOUSE | LALEETGTEVK        | 2 | y9  | 1 | light |
| NCDN_MOUSE | LALEETGTEVK        | 2 | y8  | 1 | light |
| NCDN_MOUSE | LALEETGTEVK        | 2 | y7  | 1 | light |
| NCDN_MOUSE | LALEETGTEVK        | 2 | y6  | 1 | light |
| NCDN_MOUSE | LALEETGTEVK        | 2 | y5  | 1 | light |
| NCDN_MOUSE | LALEETGTEVK        | 2 | y9  | 1 | heavy |
| NCDN_MOUSE | LALEETGTEVK        | 2 | y8  | 1 | heavy |
| NCDN_MOUSE | LALEETGTEVK        | 2 | y7  | 1 | heavy |
| NCDN_MOUSE | LALEETGTEVK        | 2 | y6  | 1 | heavy |
| NCDN_MOUSE | LALEETGTEVK        | 2 | y5  | 1 | heavy |
| NFL_MOUSE  | FASFIER            | 2 | y6  | 1 | light |
| NFL_MOUSE  | FASFIER            | 2 | y5  | 1 | light |
| NFL_MOUSE  | FASFIER            | 2 | y4  | 1 | light |
| NFL_MOUSE  | FASFIER            | 2 | y3  | 1 | light |

|             |              |   |    |   |       |
|-------------|--------------|---|----|---|-------|
| NFL_MOUSE   | FASFIER      | 2 | b2 | 1 | light |
| NFL_MOUSE   | FASFIER      | 2 | b3 | 1 | light |
| NFL_MOUSE   | FASFIER      | 2 | y6 | 1 | heavy |
| NFL_MOUSE   | FASFIER      | 2 | y5 | 1 | heavy |
| NFL_MOUSE   | FASFIER      | 2 | y4 | 1 | heavy |
| NFL_MOUSE   | FASFIER      | 2 | y3 | 1 | heavy |
| NFL_MOUSE   | FASFIER      | 2 | b2 | 1 | heavy |
| NFL_MOUSE   | FASFIER      | 2 | b3 | 1 | heavy |
| NFL_MOUSE   | VLEAELLVLR   | 2 | y8 | 1 | light |
| NFL_MOUSE   | VLEAELLVLR   | 2 | y6 | 1 | light |
| NFL_MOUSE   | VLEAELLVLR   | 2 | y5 | 1 | light |
| NFL_MOUSE   | VLEAELLVLR   | 2 | y4 | 1 | light |
| NFL_MOUSE   | VLEAELLVLR   | 2 | y3 | 1 | light |
| NFL_MOUSE   | VLEAELLVLR   | 2 | y2 | 1 | light |
| NFL_MOUSE   | VLEAELLVLR   | 2 | y8 | 1 | heavy |
| NFL_MOUSE   | VLEAELLVLR   | 2 | y6 | 1 | heavy |
| NFL_MOUSE   | VLEAELLVLR   | 2 | y5 | 1 | heavy |
| NFL_MOUSE   | VLEAELLVLR   | 2 | y4 | 1 | heavy |
| NFL_MOUSE   | VLEAELLVLR   | 2 | y3 | 1 | heavy |
| NFL_MOUSE   | VLEAELLVLR   | 2 | y2 | 1 | heavy |
| NFL_MOUSE   | FTVLTESAAK   | 2 | y8 | 1 | light |
| NFL_MOUSE   | FTVLTESAAK   | 2 | y7 | 1 | light |
| NFL_MOUSE   | FTVLTESAAK   | 2 | y6 | 1 | light |
| NFL_MOUSE   | FTVLTESAAK   | 2 | y5 | 1 | light |
| NFL_MOUSE   | FTVLTESAAK   | 2 | y4 | 1 | light |
| NFL_MOUSE   | FTVLTESAAK   | 2 | b4 | 1 | light |
| NFL_MOUSE   | FTVLTESAAK   | 2 | y8 | 1 | heavy |
| NFL_MOUSE   | FTVLTESAAK   | 2 | y7 | 1 | heavy |
| NFL_MOUSE   | FTVLTESAAK   | 2 | y6 | 1 | heavy |
| NFL_MOUSE   | FTVLTESAAK   | 2 | y5 | 1 | heavy |
| NFL_MOUSE   | FTVLTESAAK   | 2 | y4 | 1 | heavy |
| NFL_MOUSE   | FTVLTESAAK   | 2 | b4 | 1 | heavy |
| NMDZ1_MOUSE | CDLVTTGELFFR | 2 | y9 | 1 | light |
| NMDZ1_MOUSE | CDLVTTGELFFR | 2 | y8 | 1 | light |
| NMDZ1_MOUSE | CDLVTTGELFFR | 2 | y7 | 1 | light |
| NMDZ1_MOUSE | CDLVTTGELFFR | 2 | y6 | 1 | light |
| NMDZ1_MOUSE | CDLVTTGELFFR | 2 | y4 | 1 | light |
| NMDZ1_MOUSE | CDLVTTGELFFR | 2 | y3 | 1 | light |
| NMDZ1_MOUSE | CDLVTTGELFFR | 2 | y2 | 1 | light |
| NMDZ1_MOUSE | CDLVTTGELFFR | 2 | y9 | 1 | heavy |
| NMDZ1_MOUSE | CDLVTTGELFFR | 2 | y8 | 1 | heavy |
| NMDZ1_MOUSE | CDLVTTGELFFR | 2 | y7 | 1 | heavy |
| NMDZ1_MOUSE | CDLVTTGELFFR | 2 | y6 | 1 | heavy |
| NMDZ1_MOUSE | CDLVTTGELFFR | 2 | y4 | 1 | heavy |



|             |              |   |     |   |       |
|-------------|--------------|---|-----|---|-------|
| NMDZ1_MOUSE | CDLVTTGELFFR | 2 | y3  | 1 | heavy |
| NMDZ1_MOUSE | CDLVTTGELFFR | 2 | y2  | 1 | heavy |
| NRDC_MOUSE  | LGADESEEEGR  | 2 | y9  | 1 | light |
| NRDC_MOUSE  | LGADESEEEGR  | 2 | y8  | 1 | light |
| NRDC_MOUSE  | LGADESEEEGR  | 2 | y7  | 1 | light |
| NRDC_MOUSE  | LGADESEEEGR  | 2 | y6  | 1 | light |
| NRDC_MOUSE  | LGADESEEEGR  | 2 | y5  | 1 | light |
| NRDC_MOUSE  | LGADESEEEGR  | 2 | y4  | 1 | light |
| NRDC_MOUSE  | LGADESEEEGR  | 2 | y3  | 1 | light |
| NRDC_MOUSE  | LGADESEEEGR  | 2 | b4  | 1 | light |
| NRDC_MOUSE  | LGADESEEEGR  | 2 | b5  | 1 | light |
| NRDC_MOUSE  | LGADESEEEGR  | 2 | y9  | 1 | heavy |
| NRDC_MOUSE  | LGADESEEEGR  | 2 | y8  | 1 | heavy |
| NRDC_MOUSE  | LGADESEEEGR  | 2 | y7  | 1 | heavy |
| NRDC_MOUSE  | LGADESEEEGR  | 2 | y6  | 1 | heavy |
| NRDC_MOUSE  | LGADESEEEGR  | 2 | y5  | 1 | heavy |
| NRDC_MOUSE  | LGADESEEEGR  | 2 | y4  | 1 | heavy |
| NRDC_MOUSE  | LGADESEEEGR  | 2 | y3  | 1 | heavy |
| NRDC_MOUSE  | LGADESEEEGR  | 2 | b4  | 1 | heavy |
| NRDC_MOUSE  | LGADESEEEGR  | 2 | b5  | 1 | heavy |
| NRDC_MOUSE  | SFSNVGDPEIHK | 2 | y10 | 1 | light |
| NRDC_MOUSE  | SFSNVGDPEIHK | 2 | y9  | 1 | light |
| NRDC_MOUSE  | SFSNVGDPEIHK | 2 | y8  | 1 | light |
| NRDC_MOUSE  | SFSNVGDPEIHK | 2 | y7  | 1 | light |
| NRDC_MOUSE  | SFSNVGDPEIHK | 2 | y6  | 1 | light |
| NRDC_MOUSE  | SFSNVGDPEIHK | 2 | y5  | 1 | light |
| NRDC_MOUSE  | SFSNVGDPEIHK | 2 | y10 | 1 | heavy |
| NRDC_MOUSE  | SFSNVGDPEIHK | 2 | y9  | 1 | heavy |
| NRDC_MOUSE  | SFSNVGDPEIHK | 2 | y8  | 1 | heavy |
| NRDC_MOUSE  | SFSNVGDPEIHK | 2 | y7  | 1 | heavy |
| NRDC_MOUSE  | SFSNVGDPEIHK | 2 | y6  | 1 | heavy |
| NRDC_MOUSE  | SFSNVGDPEIHK | 2 | y5  | 1 | heavy |
| OGT1_MOUSE  | AFLDSLDPVK   | 2 | y8  | 1 | light |
| OGT1_MOUSE  | AFLDSLDPVK   | 2 | y7  | 1 | light |
| OGT1_MOUSE  | AFLDSLDPVK   | 2 | y6  | 1 | light |
| OGT1_MOUSE  | AFLDSLDPVK   | 2 | y4  | 1 | light |
| OGT1_MOUSE  | AFLDSLDPVK   | 2 | y8  | 2 | light |
| OGT1_MOUSE  | AFLDSLDPVK   | 2 | b2  | 1 | light |
| OGT1_MOUSE  | AFLDSLDPVK   | 2 | y8  | 1 | heavy |
| OGT1_MOUSE  | AFLDSLDPVK   | 2 | y7  | 1 | heavy |
| OGT1_MOUSE  | AFLDSLDPVK   | 2 | y6  | 1 | heavy |
| OGT1_MOUSE  | AFLDSLDPVK   | 2 | y4  | 1 | heavy |
| OGT1_MOUSE  | AFLDSLDPVK   | 2 | y8  | 2 | heavy |
| OGT1_MOUSE  | AFLDSLDPVK   | 2 | b2  | 1 | heavy |

|             |                   |   |     |   |       |
|-------------|-------------------|---|-----|---|-------|
| PEA15_MOUSE | RPDLTMVVDYR       | 2 | y2  | 1 | light |
| PEA15_MOUSE | RPDLTMVVDYR       | 2 | b2  | 1 | light |
| PEA15_MOUSE | RPDLTMVVDYR       | 2 | b3  | 1 | light |
| PEA15_MOUSE | RPDLTMVVDYR       | 2 | b10 | 1 | light |
| PEA15_MOUSE | RPDLTMVVDYR       | 2 | y2  | 1 | heavy |
| PEA15_MOUSE | RPDLTMVVDYR       | 2 | b2  | 1 | heavy |
| PEA15_MOUSE | RPDLTMVVDYR       | 2 | b3  | 1 | heavy |
| PEA15_MOUSE | RPDLTMVVDYR       | 2 | b10 | 1 | heavy |
| PEA15_MOUSE | RPDLTMVVDYR       | 3 | y5  | 1 | light |
| PEA15_MOUSE | RPDLTMVVDYR       | 3 | y3  | 1 | light |
| PEA15_MOUSE | RPDLTMVVDYR       | 3 | y2  | 1 | light |
| PEA15_MOUSE | RPDLTMVVDYR       | 3 | b6  | 1 | light |
| PEA15_MOUSE | RPDLTMVVDYR       | 3 | b7  | 1 | light |
| PEA15_MOUSE | RPDLTMVVDYR       | 3 | y5  | 1 | heavy |
| PEA15_MOUSE | RPDLTMVVDYR       | 3 | y3  | 1 | heavy |
| PEA15_MOUSE | RPDLTMVVDYR       | 3 | y2  | 1 | heavy |
| PEA15_MOUSE | RPDLTMVVDYR       | 3 | b6  | 1 | heavy |
| PEA15_MOUSE | RPDLTMVVDYR       | 3 | b7  | 1 | heavy |
| PEA15_MOUSE | ISEEEELDTK        | 2 | y9  | 1 | light |
| PEA15_MOUSE | ISEEEELDTK        | 2 | y8  | 1 | light |
| PEA15_MOUSE | ISEEEELDTK        | 2 | y7  | 1 | light |
| PEA15_MOUSE | ISEEEELDTK        | 2 | y6  | 1 | light |
| PEA15_MOUSE | ISEEEELDTK        | 2 | y5  | 1 | light |
| PEA15_MOUSE | ISEEEELDTK        | 2 | y4  | 1 | light |
| PEA15_MOUSE | ISEEEELDTK        | 2 | y3  | 1 | light |
| PEA15_MOUSE | ISEEEELDTK        | 2 | y2  | 1 | light |
| PEA15_MOUSE | ISEEEELDTK        | 2 | y9  | 1 | heavy |
| PEA15_MOUSE | ISEEEELDTK        | 2 | y8  | 1 | heavy |
| PEA15_MOUSE | ISEEEELDTK        | 2 | y7  | 1 | heavy |
| PEA15_MOUSE | ISEEEELDTK        | 2 | y6  | 1 | heavy |
| PEA15_MOUSE | ISEEEELDTK        | 2 | y5  | 1 | heavy |
| PEA15_MOUSE | ISEEEELDTK        | 2 | y4  | 1 | heavy |
| PEA15_MOUSE | ISEEEELDTK        | 2 | y3  | 1 | heavy |
| PEA15_MOUSE | ISEEEELDTK        | 2 | y2  | 1 | heavy |
| PP2BB_MOUSE | IINEGAILR         | 2 | y7  | 1 | light |
| PP2BB_MOUSE | IINEGAILR         | 2 | y6  | 1 | light |
| PP2BB_MOUSE | IINEGAILR         | 2 | y4  | 1 | light |
| PP2BB_MOUSE | IINEGAILR         | 2 | b4  | 1 | light |
| PP2BB_MOUSE | IINEGAILR         | 2 | y7  | 1 | heavy |
| PP2BB_MOUSE | IINEGAILR         | 2 | y6  | 1 | heavy |
| PP2BB_MOUSE | IINEGAILR         | 2 | y4  | 1 | heavy |
| PP2BB_MOUSE | IINEGAILR         | 2 | b4  | 1 | heavy |
| PP2BB_MOUSE | GLTPTGMLPSGVLAGGR | 2 | y10 | 1 | light |
| PP2BB_MOUSE | GLTPTGMLPSGVLAGGR | 2 | y9  | 1 | light |

|             |                   |   |     |   |       |
|-------------|-------------------|---|-----|---|-------|
| PP2BB_MOUSE | GLTPTGMLPSGVLAGGR | 2 | y5  | 1 | light |
| PP2BB_MOUSE | GLTPTGMLPSGVLAGGR | 2 | y15 | 2 | light |
| PP2BB_MOUSE | GLTPTGMLPSGVLAGGR | 2 | y14 | 2 | light |
| PP2BB_MOUSE | GLTPTGMLPSGVLAGGR | 2 | y10 | 1 | heavy |
| PP2BB_MOUSE | GLTPTGMLPSGVLAGGR | 2 | y9  | 1 | heavy |
| PP2BB_MOUSE | GLTPTGMLPSGVLAGGR | 2 | y5  | 1 | heavy |
| PP2BB_MOUSE | GLTPTGMLPSGVLAGGR | 2 | y15 | 2 | heavy |
| PP2BB_MOUSE | GLTPTGMLPSGVLAGGR | 2 | y14 | 2 | heavy |
| PP2BC_MOUSE | YFLGDYVDR         | 2 | y8  | 1 | light |
| PP2BC_MOUSE | YFLGDYVDR         | 2 | y7  | 1 | light |
| PP2BC_MOUSE | YFLGDYVDR         | 2 | y6  | 1 | light |
| PP2BC_MOUSE | YFLGDYVDR         | 2 | y5  | 1 | light |
| PP2BC_MOUSE | YFLGDYVDR         | 2 | y4  | 1 | light |
| PP2BC_MOUSE | YFLGDYVDR         | 2 | y8  | 2 | light |
| PP2BC_MOUSE | YFLGDYVDR         | 2 | b3  | 1 | light |
| PP2BC_MOUSE | YFLGDYVDR         | 2 | b4  | 1 | light |
| PP2BC_MOUSE | YFLGDYVDR         | 2 | y8  | 1 | heavy |
| PP2BC_MOUSE | YFLGDYVDR         | 2 | y7  | 1 | heavy |
| PP2BC_MOUSE | YFLGDYVDR         | 2 | y6  | 1 | heavy |
| PP2BC_MOUSE | YFLGDYVDR         | 2 | y5  | 1 | heavy |
| PP2BC_MOUSE | YFLGDYVDR         | 2 | y4  | 1 | heavy |
| PP2BC_MOUSE | YFLGDYVDR         | 2 | y8  | 2 | heavy |
| PP2BC_MOUSE | YFLGDYVDR         | 2 | b3  | 1 | heavy |
| PP2BC_MOUSE | YFLGDYVDR         | 2 | b4  | 1 | heavy |
| PP2BC_MOUSE | HLTEYFTFK         | 2 | y8  | 1 | light |
| PP2BC_MOUSE | HLTEYFTFK         | 2 | y7  | 1 | light |
| PP2BC_MOUSE | HLTEYFTFK         | 2 | y6  | 1 | light |
| PP2BC_MOUSE | HLTEYFTFK         | 2 | y5  | 1 | light |
| PP2BC_MOUSE | HLTEYFTFK         | 2 | y3  | 1 | light |
| PP2BC_MOUSE | HLTEYFTFK         | 2 | b2  | 1 | light |
| PP2BC_MOUSE | HLTEYFTFK         | 2 | b4  | 1 | light |
| PP2BC_MOUSE | HLTEYFTFK         | 2 | b6  | 1 | light |
| PP2BC_MOUSE | HLTEYFTFK         | 2 | b7  | 1 | light |
| PP2BC_MOUSE | HLTEYFTFK         | 2 | b8  | 1 | light |
| PP2BC_MOUSE | HLTEYFTFK         | 2 | y8  | 1 | heavy |
| PP2BC_MOUSE | HLTEYFTFK         | 2 | y7  | 1 | heavy |
| PP2BC_MOUSE | HLTEYFTFK         | 2 | y6  | 1 | heavy |
| PP2BC_MOUSE | HLTEYFTFK         | 2 | y5  | 1 | heavy |
| PP2BC_MOUSE | HLTEYFTFK         | 2 | y3  | 1 | heavy |
| PP2BC_MOUSE | HLTEYFTFK         | 2 | b2  | 1 | heavy |
| PP2BC_MOUSE | HLTEYFTFK         | 2 | b4  | 1 | heavy |
| PP2BC_MOUSE | HLTEYFTFK         | 2 | b6  | 1 | heavy |
| PP2BC_MOUSE | HLTEYFTFK         | 2 | b7  | 1 | heavy |
| PP2BC_MOUSE | HLTEYFTFK         | 2 | b8  | 1 | heavy |

|            |                   |   |     |   |       |
|------------|-------------------|---|-----|---|-------|
| PROD_MOUSE | LEVAVLQDSIAK      | 2 | y10 | 1 | light |
| PROD_MOUSE | LEVAVLQDSIAK      | 2 | y9  | 1 | light |
| PROD_MOUSE | LEVAVLQDSIAK      | 2 | y8  | 1 | light |
| PROD_MOUSE | LEVAVLQDSIAK      | 2 | y7  | 1 | light |
| PROD_MOUSE | LEVAVLQDSIAK      | 2 | y6  | 1 | light |
| PROD_MOUSE | LEVAVLQDSIAK      | 2 | y5  | 1 | light |
| PROD_MOUSE | LEVAVLQDSIAK      | 2 | b4  | 1 | light |
| PROD_MOUSE | LEVAVLQDSIAK      | 2 | b5  | 1 | light |
| PROD_MOUSE | LEVAVLQDSIAK      | 2 | y10 | 1 | heavy |
| PROD_MOUSE | LEVAVLQDSIAK      | 2 | y9  | 1 | heavy |
| PROD_MOUSE | LEVAVLQDSIAK      | 2 | y8  | 1 | heavy |
| PROD_MOUSE | LEVAVLQDSIAK      | 2 | y7  | 1 | heavy |
| PROD_MOUSE | LEVAVLQDSIAK      | 2 | y6  | 1 | heavy |
| PROD_MOUSE | LEVAVLQDSIAK      | 2 | y5  | 1 | heavy |
| PROD_MOUSE | LEVAVLQDSIAK      | 2 | b4  | 1 | heavy |
| PROD_MOUSE | LEVAVLQDSIAK      | 2 | b5  | 1 | heavy |
| RANG_MOUSE | FASENDLPEWK       | 2 | y7  | 1 | light |
| RANG_MOUSE | FASENDLPEWK       | 2 | y6  | 1 | light |
| RANG_MOUSE | FASENDLPEWK       | 2 | y5  | 1 | light |
| RANG_MOUSE | FASENDLPEWK       | 2 | y4  | 1 | light |
| RANG_MOUSE | FASENDLPEWK       | 2 | y2  | 1 | light |
| RANG_MOUSE | FASENDLPEWK       | 2 | y9  | 2 | light |
| RANG_MOUSE | FASENDLPEWK       | 2 | y7  | 1 | heavy |
| RANG_MOUSE | FASENDLPEWK       | 2 | y6  | 1 | heavy |
| RANG_MOUSE | FASENDLPEWK       | 2 | y5  | 1 | heavy |
| RANG_MOUSE | FASENDLPEWK       | 2 | y4  | 1 | heavy |
| RANG_MOUSE | FASENDLPEWK       | 2 | y2  | 1 | heavy |
| RANG_MOUSE | FASENDLPEWK       | 2 | y9  | 2 | heavy |
| RANG_MOUSE | FLNAENAQK         | 2 | y8  | 1 | light |
| RANG_MOUSE | FLNAENAQK         | 2 | y7  | 1 | light |
| RANG_MOUSE | FLNAENAQK         | 2 | y6  | 1 | light |
| RANG_MOUSE | FLNAENAQK         | 2 | b2  | 1 | light |
| RANG_MOUSE | FLNAENAQK         | 2 | b3  | 1 | light |
| RANG_MOUSE | FLNAENAQK         | 2 | y8  | 1 | heavy |
| RANG_MOUSE | FLNAENAQK         | 2 | y7  | 1 | heavy |
| RANG_MOUSE | FLNAENAQK         | 2 | y6  | 1 | heavy |
| RANG_MOUSE | FLNAENAQK         | 2 | b2  | 1 | heavy |
| RANG_MOUSE | FLNAENAQK         | 2 | b3  | 1 | heavy |
| RHOA_MOUSE | QVELALWDTAGQEDYDR | 2 | y11 | 1 | light |
| RHOA_MOUSE | QVELALWDTAGQEDYDR | 2 | y10 | 1 | light |
| RHOA_MOUSE | QVELALWDTAGQEDYDR | 2 | y9  | 1 | light |
| RHOA_MOUSE | QVELALWDTAGQEDYDR | 2 | y8  | 1 | light |
| RHOA_MOUSE | QVELALWDTAGQEDYDR | 2 | y7  | 1 | light |
| RHOA_MOUSE | QVELALWDTAGQEDYDR | 2 | y5  | 1 | light |

|            |                   |   |     |   |       |
|------------|-------------------|---|-----|---|-------|
| RHOA_MOUSE | QVELALWDTAGQEDYDR | 2 | y3  | 1 | light |
| RHOA_MOUSE | QVELALWDTAGQEDYDR | 2 | b7  | 1 | light |
| RHOA_MOUSE | QVELALWDTAGQEDYDR | 2 | b10 | 1 | light |
| RHOA_MOUSE | QVELALWDTAGQEDYDR | 2 | y11 | 1 | heavy |
| RHOA_MOUSE | QVELALWDTAGQEDYDR | 2 | y10 | 1 | heavy |
| RHOA_MOUSE | QVELALWDTAGQEDYDR | 2 | y9  | 1 | heavy |
| RHOA_MOUSE | QVELALWDTAGQEDYDR | 2 | y8  | 1 | heavy |
| RHOA_MOUSE | QVELALWDTAGQEDYDR | 2 | y7  | 1 | heavy |
| RHOA_MOUSE | QVELALWDTAGQEDYDR | 2 | y5  | 1 | heavy |
| RHOA_MOUSE | QVELALWDTAGQEDYDR | 2 | y3  | 1 | heavy |
| RHOA_MOUSE | QVELALWDTAGQEDYDR | 2 | b7  | 1 | heavy |
| RHOA_MOUSE | QVELALWDTAGQEDYDR | 2 | b10 | 1 | heavy |
| RHOA_MOUSE | IGAFGYMECSAK      | 2 | y8  | 1 | light |
| RHOA_MOUSE | IGAFGYMECSAK      | 2 | y7  | 1 | light |
| RHOA_MOUSE | IGAFGYMECSAK      | 2 | y6  | 1 | light |
| RHOA_MOUSE | IGAFGYMECSAK      | 2 | y5  | 1 | light |
| RHOA_MOUSE | IGAFGYMECSAK      | 2 | y4  | 1 | light |
| RHOA_MOUSE | IGAFGYMECSAK      | 2 | y9  | 2 | light |
| RHOA_MOUSE | IGAFGYMECSAK      | 2 | y8  | 1 | heavy |
| RHOA_MOUSE | IGAFGYMECSAK      | 2 | y7  | 1 | heavy |
| RHOA_MOUSE | IGAFGYMECSAK      | 2 | y6  | 1 | heavy |
| RHOA_MOUSE | IGAFGYMECSAK      | 2 | y5  | 1 | heavy |
| RHOA_MOUSE | IGAFGYMECSAK      | 2 | y4  | 1 | heavy |
| RHOA_MOUSE | IGAFGYMECSAK      | 2 | y9  | 2 | heavy |
| RL8_MOUSE  | AVVGVVAGGGR       | 2 | y9  | 1 | light |
| RL8_MOUSE  | AVVGVVAGGGR       | 2 | y8  | 1 | light |
| RL8_MOUSE  | AVVGVVAGGGR       | 2 | y6  | 1 | light |
| RL8_MOUSE  | AVVGVVAGGGR       | 2 | y4  | 1 | light |
| RL8_MOUSE  | AVVGVVAGGGR       | 2 | y3  | 1 | light |
| RL8_MOUSE  | AVVGVVAGGGR       | 2 | y9  | 1 | heavy |
| RL8_MOUSE  | AVVGVVAGGGR       | 2 | y8  | 1 | heavy |
| RL8_MOUSE  | AVVGVVAGGGR       | 2 | y6  | 1 | heavy |
| RL8_MOUSE  | AVVGVVAGGGR       | 2 | y4  | 1 | heavy |
| RL8_MOUSE  | AVVGVVAGGGR       | 2 | y3  | 1 | heavy |
| RS3A_MOUSE | APAMFNIR          | 2 | y6  | 1 | light |
| RS3A_MOUSE | APAMFNIR          | 2 | y5  | 1 | light |
| RS3A_MOUSE | APAMFNIR          | 2 | y4  | 1 | light |
| RS3A_MOUSE | APAMFNIR          | 2 | y7  | 2 | light |
| RS3A_MOUSE | APAMFNIR          | 2 | b2  | 1 | light |
| RS3A_MOUSE | APAMFNIR          | 2 | b3  | 1 | light |
| RS3A_MOUSE | APAMFNIR          | 2 | y6  | 1 | heavy |
| RS3A_MOUSE | APAMFNIR          | 2 | y5  | 1 | heavy |
| RS3A_MOUSE | APAMFNIR          | 2 | y4  | 1 | heavy |
| RS3A_MOUSE | APAMFNIR          | 2 | y7  | 2 | heavy |

|             |                   |   |     |   |       |
|-------------|-------------------|---|-----|---|-------|
| RS3A_MOUSE  | APAMFNIR          | 2 | b2  | 1 | heavy |
| RS3A_MOUSE  | APAMFNIR          | 2 | b3  | 1 | heavy |
| RS3A_MOUSE  | LITEDVQGK         | 2 | y7  | 1 | light |
| RS3A_MOUSE  | LITEDVQGK         | 2 | y6  | 1 | light |
| RS3A_MOUSE  | LITEDVQGK         | 2 | y5  | 1 | light |
| RS3A_MOUSE  | LITEDVQGK         | 2 | y4  | 1 | light |
| RS3A_MOUSE  | LITEDVQGK         | 2 | y7  | 2 | light |
| RS3A_MOUSE  | LITEDVQGK         | 2 | b2  | 1 | light |
| RS3A_MOUSE  | LITEDVQGK         | 2 | b3  | 1 | light |
| RS3A_MOUSE  | LITEDVQGK         | 2 | y7  | 1 | heavy |
| RS3A_MOUSE  | LITEDVQGK         | 2 | y6  | 1 | heavy |
| RS3A_MOUSE  | LITEDVQGK         | 2 | y5  | 1 | heavy |
| RS3A_MOUSE  | LITEDVQGK         | 2 | y4  | 1 | heavy |
| RS3A_MOUSE  | LITEDVQGK         | 2 | y7  | 2 | heavy |
| RS3A_MOUSE  | LITEDVQGK         | 2 | b2  | 1 | heavy |
| RS3A_MOUSE  | LITEDVQGK         | 2 | b3  | 1 | heavy |
| SEPT5_MOUSE | INQTVEILK         | 2 | y8  | 1 | light |
| SEPT5_MOUSE | INQTVEILK         | 2 | y7  | 1 | light |
| SEPT5_MOUSE | INQTVEILK         | 2 | y6  | 1 | light |
| SEPT5_MOUSE | INQTVEILK         | 2 | y5  | 1 | light |
| SEPT5_MOUSE | INQTVEILK         | 2 | y4  | 1 | light |
| SEPT5_MOUSE | INQTVEILK         | 2 | y2  | 1 | light |
| SEPT5_MOUSE | INQTVEILK         | 2 | y8  | 1 | heavy |
| SEPT5_MOUSE | INQTVEILK         | 2 | y7  | 1 | heavy |
| SEPT5_MOUSE | INQTVEILK         | 2 | y6  | 1 | heavy |
| SEPT5_MOUSE | INQTVEILK         | 2 | y5  | 1 | heavy |
| SEPT5_MOUSE | INQTVEILK         | 2 | y4  | 1 | heavy |
| SEPT5_MOUSE | INQTVEILK         | 2 | y2  | 1 | heavy |
| SEPT5_MOUSE | MESPIPLPLTPDAETEK | 2 | y9  | 1 | light |
| SEPT5_MOUSE | MESPIPLPLTPDAETEK | 2 | y5  | 1 | light |
| SEPT5_MOUSE | MESPIPLPLTPDAETEK | 2 | b5  | 1 | light |
| SEPT5_MOUSE | MESPIPLPLTPDAETEK | 2 | b7  | 1 | light |
| SEPT5_MOUSE | MESPIPLPLTPDAETEK | 2 | y9  | 1 | heavy |
| SEPT5_MOUSE | MESPIPLPLTPDAETEK | 2 | y5  | 1 | heavy |
| SEPT5_MOUSE | MESPIPLPLTPDAETEK | 2 | b5  | 1 | heavy |
| SEPT5_MOUSE | MESPIPLPLTPDAETEK | 2 | b7  | 1 | heavy |
| SYN1_MOUSE  | VLLVIDEPHTDWAK    | 2 | y7  | 1 | light |
| SYN1_MOUSE  | VLLVIDEPHTDWAK    | 2 | y3  | 1 | light |
| SYN1_MOUSE  | VLLVIDEPHTDWAK    | 2 | y12 | 2 | light |
| SYN1_MOUSE  | VLLVIDEPHTDWAK    | 2 | y11 | 2 | light |
| SYN1_MOUSE  | VLLVIDEPHTDWAK    | 2 | b3  | 1 | light |
| SYN1_MOUSE  | VLLVIDEPHTDWAK    | 2 | b4  | 1 | light |
| SYN1_MOUSE  | VLLVIDEPHTDWAK    | 2 | y7  | 1 | heavy |
| SYN1_MOUSE  | VLLVIDEPHTDWAK    | 2 | y3  | 1 | heavy |

|            |                |   |     |   |       |
|------------|----------------|---|-----|---|-------|
| SYN1_MOUSE | VLLVIDEPHTDWAK | 2 | y12 | 2 | heavy |
| SYN1_MOUSE | VLLVIDEPHTDWAK | 2 | y11 | 2 | heavy |
| SYN1_MOUSE | VLLVIDEPHTDWAK | 2 | b3  | 1 | heavy |
| SYN1_MOUSE | VLLVIDEPHTDWAK | 2 | b4  | 1 | heavy |
| SYN1_MOUSE | EMLSSTYPVVVK   | 2 | y10 | 1 | light |
| SYN1_MOUSE | EMLSSTYPVVVK   | 2 | y9  | 1 | light |
| SYN1_MOUSE | EMLSSTYPVVVK   | 2 | y8  | 1 | light |
| SYN1_MOUSE | EMLSSTYPVVVK   | 2 | y7  | 1 | light |
| SYN1_MOUSE | EMLSSTYPVVVK   | 2 | y6  | 1 | light |
| SYN1_MOUSE | EMLSSTYPVVVK   | 2 | y5  | 1 | light |
| SYN1_MOUSE | EMLSSTYPVVVK   | 2 | y10 | 1 | heavy |
| SYN1_MOUSE | EMLSSTYPVVVK   | 2 | y9  | 1 | heavy |
| SYN1_MOUSE | EMLSSTYPVVVK   | 2 | y8  | 1 | heavy |
| SYN1_MOUSE | EMLSSTYPVVVK   | 2 | y7  | 1 | heavy |
| SYN1_MOUSE | EMLSSTYPVVVK   | 2 | y6  | 1 | heavy |
| SYN1_MOUSE | EMLSSTYPVVVK   | 2 | y5  | 1 | heavy |
| SYT1_MOUSE | HDIIGEFK       | 2 | y7  | 1 | light |
| SYT1_MOUSE | HDIIGEFK       | 2 | y6  | 1 | light |
| SYT1_MOUSE | HDIIGEFK       | 2 | y2  | 1 | light |
| SYT1_MOUSE | HDIIGEFK       | 2 | b2  | 1 | light |
| SYT1_MOUSE | HDIIGEFK       | 2 | b3  | 1 | light |
| SYT1_MOUSE | HDIIGEFK       | 2 | b6  | 1 | light |
| SYT1_MOUSE | HDIIGEFK       | 2 | y7  | 1 | heavy |
| SYT1_MOUSE | HDIIGEFK       | 2 | y6  | 1 | heavy |
| SYT1_MOUSE | HDIIGEFK       | 2 | y2  | 1 | heavy |
| SYT1_MOUSE | HDIIGEFK       | 2 | b2  | 1 | heavy |
| SYT1_MOUSE | HDIIGEFK       | 2 | b3  | 1 | heavy |
| SYT1_MOUSE | HDIIGEFK       | 2 | b6  | 1 | heavy |
| SYT1_MOUSE | VFVGYNSTGAELR  | 2 | y10 | 1 | light |
| SYT1_MOUSE | VFVGYNSTGAELR  | 2 | y9  | 1 | light |
| SYT1_MOUSE | VFVGYNSTGAELR  | 2 | y8  | 1 | light |
| SYT1_MOUSE | VFVGYNSTGAELR  | 2 | y7  | 1 | light |
| SYT1_MOUSE | VFVGYNSTGAELR  | 2 | y6  | 1 | light |
| SYT1_MOUSE | VFVGYNSTGAELR  | 2 | y10 | 1 | heavy |
| SYT1_MOUSE | VFVGYNSTGAELR  | 2 | y9  | 1 | heavy |
| SYT1_MOUSE | VFVGYNSTGAELR  | 2 | y8  | 1 | heavy |
| SYT1_MOUSE | VFVGYNSTGAELR  | 2 | y7  | 1 | heavy |
| SYT1_MOUSE | VFVGYNSTGAELR  | 2 | y6  | 1 | heavy |
| TXTP_MOUSE | TQLQLDER       | 2 | y6  | 1 | light |
| TXTP_MOUSE | TQLQLDER       | 2 | y5  | 1 | light |
| TXTP_MOUSE | TQLQLDER       | 2 | y4  | 1 | light |
| TXTP_MOUSE | TQLQLDER       | 2 | y3  | 1 | light |
| TXTP_MOUSE | TQLQLDER       | 2 | y2  | 1 | light |
| TXTP_MOUSE | TQLQLDER       | 2 | b3  | 1 | light |

|             |             |   |    |   |       |
|-------------|-------------|---|----|---|-------|
| TXTP_MOUSE  | TQLQLDER    | 2 | y6 | 1 | heavy |
| TXTP_MOUSE  | TQLQLDER    | 2 | y5 | 1 | heavy |
| TXTP_MOUSE  | TQLQLDER    | 2 | y4 | 1 | heavy |
| TXTP_MOUSE  | TQLQLDER    | 2 | y3 | 1 | heavy |
| TXTP_MOUSE  | TQLQLDER    | 2 | y2 | 1 | heavy |
| TXTP_MOUSE  | TQLQLDER    | 2 | b3 | 1 | heavy |
| TXTP_MOUSE  | FFVMTSLR    | 2 | y6 | 1 | light |
| TXTP_MOUSE  | FFVMTSLR    | 2 | y5 | 1 | light |
| TXTP_MOUSE  | FFVMTSLR    | 2 | b2 | 1 | light |
| TXTP_MOUSE  | FFVMTSLR    | 2 | y6 | 1 | heavy |
| TXTP_MOUSE  | FFVMTSLR    | 2 | y5 | 1 | heavy |
| TXTP_MOUSE  | FFVMTSLR    | 2 | b2 | 1 | heavy |
| VGLU1_MOUSE | YIEDAIGESAK | 2 | y9 | 1 | light |
| VGLU1_MOUSE | YIEDAIGESAK | 2 | y8 | 1 | light |
| VGLU1_MOUSE | YIEDAIGESAK | 2 | y7 | 1 | light |
| VGLU1_MOUSE | YIEDAIGESAK | 2 | y6 | 1 | light |
| VGLU1_MOUSE | YIEDAIGESAK | 2 | y5 | 1 | light |
| VGLU1_MOUSE | YIEDAIGESAK | 2 | b2 | 1 | light |
| VGLU1_MOUSE | YIEDAIGESAK | 2 | y9 | 1 | heavy |
| VGLU1_MOUSE | YIEDAIGESAK | 2 | y8 | 1 | heavy |
| VGLU1_MOUSE | YIEDAIGESAK | 2 | y7 | 1 | heavy |
| VGLU1_MOUSE | YIEDAIGESAK | 2 | y6 | 1 | heavy |
| VGLU1_MOUSE | YIEDAIGESAK | 2 | y5 | 1 | heavy |
| VGLU1_MOUSE | YIEDAIGESAK | 2 | b2 | 1 | heavy |
