# Supplementary material for: System-based proteomic and metabonomic analysis of the Df(16)A+/− mouse identifies potential miR-185 targets and molecular pathway alterations
Source: PubMed Central journal article supplement — Mol Psychiatry. 2016 Mar 22;22(3):384–95. doi: 10.1038/mp.2016.27 (PMC5322275; doi:10.1038/mp.2016.27), 2016-03-22
Supplement: mp201627x4.pdf [file mp201627x4.pdf]

**Supplementary Table S4: Significant overlapping proteins across all cohorts**

| Uniprot ID<br>(XXX_MOUSE)                                                                                        | Accession<br>Number | Name                                                                    | Gene<br>name | Cohort 1 PFC |       |         | Cohort 2 PFC |       |         | Cohort Combined<br>PFC |       |         | Cohort 1<br>Hippocampus |       |         |
|------------------------------------------------------------------------------------------------------------------|---------------------|-------------------------------------------------------------------------|--------------|--------------|-------|---------|--------------|-------|---------|------------------------|-------|---------|-------------------------|-------|---------|
|                                                                                                                  |                     |                                                                         |              | PC           | Ratio | adj. p  | PC           | Ratio | adj. p  | PC                     | Ratio | adj. p  | PC                      | Ratio | adj. p  |
| <b>Overlap across all cohorts</b>                                                                                |                     |                                                                         |              |              |       |         |              |       |         |                        |       |         |                         |       |         |
| MBP                                                                                                              | P04370              | Myelin basic protein                                                    | Mbp          | 36           | 1.14  | 3.5E-13 | 36           | 0.94  | 1.7E-06 | 38                     | 1.07  | 9.1E-10 | 39                      | 0.95  | 8.6E-03 |
| ALBU                                                                                                             | P07724              | Serum albumin                                                           | Alb          | 57           | 1.05  | 3.1E-06 | 93           | 1.09  | 1.6E-13 | 50                     | 1.06  | 1.6E-09 | 44                      | 1.06  | 4.0E-04 |
| SEPT5                                                                                                            | Q9Z2Q6              | Septin-5                                                                | Sept5        | 8            | 0.92  | 2.2E-03 | 14           | 0.82  | <E-15   | 2                      | 0.79  | <E-15   | 2                       | 0.74  | 1.2E-07 |
| <b>Overlap cohort 1 (FC), cohort 2(FC) and cohort combined INGEL (FC) - (overlap all frontal cortex studies)</b> |                     |                                                                         |              |              |       |         |              |       |         |                        |       |         |                         |       |         |
| ODPA                                                                                                             | P35486              | Pyruvate dehydrogenase E1 component subunit alpha somatic form, mito.   | Pdha1        | 4            | 1.17  | 6.5E-06 | 13           | 1.12  | 1.4E-03 | 6                      | 0.87  | 4.5E-08 | 14                      | 1.07  | 7.3E-01 |
| H2B1B                                                                                                            | Q64475              | Histone H2B type 1-B (h2B-143)                                          | Hist1h2bb    | 2            | 1.16  | 3.5E-03 | 4            | 1.11  | 7.3E-03 | 3                      | 1.12  | 3.6E-03 | NA                      | NA    | NA      |
| ENOG                                                                                                             | P17183              | Gamma-enolase                                                           | Eno2         | 46           | 1.03  | 1.0E-02 | 96           | 1.03  | 4.4E-03 | 31                     | 0.96  | 1.3E-02 | 44                      | 1.00  | 9.2E-01 |
| PP2BC                                                                                                            | P48455              | Serine/threonine-protein phosphatase 2B catalytic subunit gamma isoform | Ppp3cc       | 3            | 1.16  | 1.2E-02 | 1            | 1.17  | 8.7E-04 | 1                      | 1.06  | 4.6E-04 | 14                      | 0.97  | 3.0E-01 |
| BASP1                                                                                                            | Q91XV3              | Brain acid soluble protein 1                                            | Basp1        | 39           | 0.95  | 2.8E-02 | 52           | 0.95  | 9.3E-05 | 13                     | 1.20  | <E-15   | 36                      | 1.00  | 9.6E-01 |
| <b>Overlap cohort 2 (FC), cohort combined INGEL (FC) and cohort 1 (HC)</b>                                       |                     |                                                                         |              |              |       |         |              |       |         |                        |       |         |                         |       |         |
| CDC42                                                                                                            | P60766              | Cell division control protein 42 hon                                    | Cdc42        | 2            | 0.94  | 1.3E-01 | 7            | 1.05  | 4.6E-02 | 2                      | 1.10  | 2.0E-03 | 8                       | 0.89  | 1.0E-02 |
| MPCP                                                                                                             | Q8VEM8              | Phosphate carrier protein, mito.                                        | Slc25a3      | 22           | 1.02  | 4.4E-01 | 25           | 0.94  | 5.1E-05 | 32                     | 1.03  | 3.8E-02 | 23                      | 0.97  | 4.6E-02 |
| GSTM7                                                                                                            | Q80W21              | Glutathione S-transferase Mu 7                                          | Gstm7        | 2            | 1.03  | 7.2E-01 | 2            | 0.93  | 5.7E-03 | 6                      | 0.88  | 7.1E-03 | 7                       | 0.90  | 2.5E-02 |
| <b>Overlap cohort 1 (FC), cohort combined INGEL (FC), cohort 1 (HC)</b>                                          |                     |                                                                         |              |              |       |         |              |       |         |                        |       |         |                         |       |         |
| H2B1P                                                                                                            | Q8CGP2              | Histone H2B type 1-P                                                    | Hist1h2bp    | 1            | 0.92  | 4.3E-05 | 5            | 0.98  | 6.3E-01 | 3                      | 1.08  | 1.3E-02 | 3                       | 0.90  | 3.4E-03 |
| HBA                                                                                                              | P01942              | Hemoglobin subunit alpha                                                | Hba          | 38           | 1.06  | 1.8E-03 | 36           | 1.00  | 9.4E-01 | 36                     | 1.10  | <E-15   | 33                      | 1.06  | 3.5E-02 |
| <b>Overlap cohort 1 (FC) and cohort 2 (FC)</b>                                                                   |                     |                                                                         |              |              |       |         |              |       |         |                        |       |         |                         |       |         |
| GSTP1                                                                                                            | P19157              | Glutathione S-transferase P 1 (Gst I)                                   | Gstp1        | 1            | 1.35  | 6.2E-11 | 1            | 0.64  | <E-15   | 6                      | 1.04  | 3.4E-01 | 3                       | 0.93  | 1.1E-01 |
| H2AX                                                                                                             | P27661              | Histone H2AX (H2a/x)                                                    | H2afx        | 1            | 1.16  | 4.7E-08 | 4            | 0.94  | 1.5E-02 | 3                      | 1.06  | 1.4E-01 | NA                      | NA    | NA      |
| NU4M                                                                                                             | P03911              | NADH-ubiquinone oxidoreductase                                          | Mtnd4        | 1            | 1.15  | 3.1E-07 | 16           | 1.07  | 2.0E-02 | NA                     | NA    | NA      | 1                       | 1.02  | 7.4E-01 |
| AAK1                                                                                                             | Q3UHJ0              | AP2-associated protein kinase 1                                         | Aak1         | 1            | 1.19  | 2.8E-05 | 2            | 1.51  | 9.1E-06 | 4                      | 0.99  | 7.1E-01 | NA                      | NA    | NA      |
| CLCA                                                                                                             | O08585              | Clathrin light chain A (Lca)                                            | Cltc         | 1            | 1.03  | 2.6E-03 | 2            | 0.92  | 2.0E-03 | 1                      | 0.94  | 1.4E-01 | NA                      | NA    | NA      |
| RTN1                                                                                                             | Q8K0T0              | Reticulon-1                                                             | Rtn1         | 9            | 1.09  | 5.8E-03 | 6            | 1.21  | 9.8E-05 | 9                      | 1.01  | 6.8E-01 | 17                      | 0.95  | 2.4E-01 |
| GDIA                                                                                                             | P50396              | Rab GDP dissociation inhibitor alpha                                    | Gdi1         | 38           | 1.06  | 1.1E-02 | 49           | 1.04  | 9.3E-03 | 31                     | 1.01  | 6.4E-01 | 38                      | 0.97  | 2.4E-01 |
| TPM3                                                                                                             | P21107              | Tropomyosin alpha-3 chain                                               | Tpm3         | 1            | 1.07  | 1.1E-02 | 2            | 0.75  | 1.6E-09 | NA                     | NA    | NA      | 1                       | 1.00  | 8.7E-01 |
| QCR6                                                                                                             | P99028              | Cytochrome b-c1 complex subunit                                         | Uqcrc        | 2            | 0.94  | 2.3E-02 | 1            | 0.92  | 5.0E-08 | NA                     | NA    | NA      | 1                       | 1.00  | 9.4E-01 |
| RAB37                                                                                                            | Q9JKM7              | Ras-related protein Rab-37                                              | Rab37        | 23           | 1.05  | 3.3E-02 | 24           | 0.93  | 2.2E-03 | 13                     | 1.00  | 9.0E-01 | 19                      | 1.03  | 6.1E-01 |
| CALL3                                                                                                            | Q9D6P8              | Calmodulin-like protein 3                                               | Calml3       | 16           | 1.07  | 3.7E-02 | 16           | 1.12  | 1.3E-03 | 9                      | 0.99  | 8.9E-01 | 9                       | 1.07  | 4.8E-01 |
| H2A1H                                                                                                            | Q8CGP6              | Histone H2A type 1-H                                                    | Hist1h2ah    | 1            | 1.11  | 3.7E-02 | 2            | 1.10  | 1.3E-04 | NA                     | NA    | NA      | 1                       | 1.20  | 8.7E-02 |
| DLG2                                                                                                             | Q91XM9              | Disks large homolog 2                                                   | Dlg2         | 2            | 1.11  | 4.1E-02 | 7            | 1.33  | 7.4E-04 | NA                     | NA    | NA      | NA                      | NA    | NA      |
| H2B1H                                                                                                            | Q64478              | Histone H2B type 1-H                                                    | Hist1h2bh    | 1            | 1.07  | 4.1E-02 | 9            | 1.11  | 4.4E-02 | 4                      | 1.02  | 6.4E-01 | 2                       | 0.92  | 1.1E-01 |
| NPTN                                                                                                             | P97300              | Neuroplastin                                                            | Nptn         | 1            | 1.02  | 4.1E-02 | 3            | 1.15  | 2.3E-02 | 2                      | 1.00  | 9.7E-01 | NA                      | NA    | NA      |
| AT1A3                                                                                                            | Q6PIC6              | Sodium/potassium-transporting ATPase subunit alpha-3                    | Atp1a3       | 108          | 1.02  | 4.7E-02 | 179          | 1.03  | 1.2E-05 | 114                    | 1.01  | 3.4E-01 | 80                      | 0.99  | 7.5E-01 |

**Overlap cohort 1 (FC) and cohorts combined INGEL (FC)**

|       |        |                                                       |          |    |      |         |     |      |         |    |      |         |    |      |         |
|-------|--------|-------------------------------------------------------|----------|----|------|---------|-----|------|---------|----|------|---------|----|------|---------|
| HBB1  | P02088 | Hemoglobin subunit beta-1                             | Hbb-b1   | 47 | 1.10 | 1.7E-12 | 56  | 1.00 | 8.6E-01 | 42 | 1.07 | 2.4E-08 | 31 | 1.02 | 4.4E-01 |
| HPRT  | P00493 | Hypoxanthine-guanine phosphoribosyltransferase        | Hprt1    | 1  | 1.24 | 6.2E-11 | NA  | NA   | NA      | 3  | 1.43 | <E-15   | NA | NA   | NA      |
| NFL   | P08551 | Neurofilament light polypeptide (N Nefl)              |          | 17 | 1.11 | 3.4E-05 | NA  | NA   | NA      | 29 | 1.09 | 3.3E-12 | 11 | 0.98 | 6.3E-01 |
| TPPP  | Q7TQD2 | Tubulin polymerization-promoting protein              | Tppp     | 17 | 1.06 | 1.1E-04 | 9   | 0.97 | 2.1E-01 | 25 | 0.94 | 1.1E-02 | 12 | 0.97 | 6.1E-01 |
| CPLX2 | P84086 | Complexin-2                                           | Cplx2    | 9  | 1.10 | 5.4E-04 | 14  | 0.98 | 4.0E-01 | 1  | 1.11 | 1.1E-07 | 5  | 0.97 | 7.7E-01 |
| AINX  | P46660 | Alpha-internexin                                      | Ina      | 7  | 1.12 | 9.2E-04 | NA  | NA   | NA      | 29 | 1.15 | <E-15   | 16 | 0.96 | 6.2E-02 |
| TBA4A | P68368 | Tubulin alpha-4A chain                                | Tuba4a   | 45 | 1.05 | 1.7E-03 | 57  | 1.00 | 8.2E-01 | 38 | 1.02 | 3.4E-02 | 22 | 1.03 | 4.0E-01 |
| COX2  | P00405 | Cytochrome c oxidase subunit 2                        | Mtco2    | 4  | 1.09 | 4.4E-03 | 11  | 0.97 | 8.7E-02 | 20 | 1.05 | 3.1E-04 | 12 | 0.97 | 3.7E-01 |
| SNP23 | O09044 | Synaptosomal-associated protein 2                     | Snap23   | 1  | 0.88 | 6.2E-03 | NA  | NA   | NA      | 2  | 1.24 | 4.7E-04 | NA | NA   | NA      |
| ALDOA | P05064 | Fructose-bisphosphate aldolase A                      | Aldoa    | 51 | 1.04 | 6.5E-03 | 106 | 0.98 | 6.0E-02 | 35 | 0.96 | 8.7E-03 | 55 | 0.97 | 1.8E-01 |
| RS7   | P62082 | 40S ribosomal protein S7                              | Rps7     | 2  | 1.08 | 8.3E-03 | NA  | NA   | NA      | 1  | 0.97 | 2.8E-02 | 1  | 0.98 | 7.5E-02 |
| QCR1  | Q9CZ13 | Cytochrome b-c1 complex subunit                       | Uqcrc1   | 23 | 1.05 | 8.8E-03 | 12  | 0.99 | 7.0E-01 | 3  | 0.93 | 1.0E-02 | 18 | 0.98 | 6.0E-01 |
| DEST  | Q9R0P5 | Destrin                                               | Dstn     | 2  | 1.11 | 3.7E-02 | 5   | 0.99 | 8.7E-01 | 1  | 0.86 | 1.2E-02 | 2  | 0.90 | 3.2E-01 |
| CMC1  | Q8BH59 | Calcium-binding mitochondrial carrier protein Aralar1 | Slc25a12 | 44 | 1.04 | 4.0E-02 | 70  | 1.02 | 1.9E-01 | 50 | 1.02 | 2.9E-02 | 27 | 1.01 | 7.8E-01 |

**Overlap cohort 2 (FC) and cohorts combined INGEL (FC)**

|       |        |                                                               |         |    |      |         |     |      |         |     |      |         |    |      |         |
|-------|--------|---------------------------------------------------------------|---------|----|------|---------|-----|------|---------|-----|------|---------|----|------|---------|
| SYN2  | Q64332 | Synapsin-2                                                    | Syn2    | 38 | 0.95 | 1.3E-01 | 70  | 1.04 | 1.1E-04 | 35  | 1.03 | 1.5E-02 | 52 | 1.00 | 9.9E-01 |
| AT1B1 | P14094 | Sodium/potassium-transporting ATPase subunit beta-1           | Atp1b1  | 27 | 1.03 | 1.3E-01 | 48  | 0.97 | 2.1E-02 | 22  | 1.05 | 8.4E-03 | 24 | 0.99 | 7.7E-01 |
| PGAM1 | Q9DBJ1 | Phosphoglycerate mutase 1                                     | Pgam1   | 30 | 1.04 | 1.6E-01 | 52  | 1.04 | 2.2E-02 | 28  | 0.95 | 3.8E-03 | 18 | 1.02 | 4.9E-01 |
| EFHD2 | Q9D8Y0 | EF-hand domain-containing proteir                             | Efhd2   | 3  | 0.97 | 1.7E-01 | 7   | 0.88 | 1.2E-04 | 1   | 1.06 | 2.5E-02 | NA | NA   | NA      |
| MAP6  | Q7TJS2 | Microtubule-associated protein 6 (                            | Map6    | 46 | 1.03 | 1.8E-01 | 91  | 0.98 | 4.2E-02 | 76  | 1.03 | 7.2E-03 | 22 | 1.01 | 9.2E-01 |
| TBA1A | P68369 | Tubulin alpha-1A chain                                        | Tuba1a  | 21 | 1.06 | 2.6E-01 | 36  | 1.05 | 3.3E-02 | 19  | 1.03 | 3.3E-02 | 5  | 1.06 | 8.8E-02 |
| THIL  | Q8QZT1 | Acetyl-CoA acetyltransferase, mito                            | Acat1   | 14 | 1.03 | 2.7E-01 | 30  | 1.05 | 2.2E-03 | 1   | 0.91 | 3.8E-03 | 26 | 1.02 | 4.6E-01 |
| GNAS2 | P63094 | Adenylate cyclase-stimulating G alpha protein                 | Gnas    | 8  | 0.97 | 3.3E-01 | 16  | 1.08 | 1.9E-03 | 3   | 1.14 | 3.0E-04 | 6  | 0.86 | 2.3E-01 |
| ARF3  | P61205 | ADP-ribosylation factor 3                                     | Arf3    | 6  | 1.04 | 3.8E-01 | 4   | 1.13 | 2.1E-02 | 9   | 1.04 | 4.6E-02 | 8  | 0.99 | 7.4E-01 |
| 1433E | P62259 | 14-3-3 protein epsilon                                        | Ywhae   | 42 | 0.97 | 4.4E-01 | 53  | 1.03 | 3.6E-02 | 35  | 0.97 | 3.8E-02 | 38 | 1.00 | 8.9E-01 |
| ENOA  | P17182 | Alpha-enolase                                                 | Eno1    | 69 | 1.01 | 4.9E-01 | 106 | 1.03 | 6.9E-04 | 40  | 0.97 | 8.1E-03 | 55 | 1.02 | 4.6E-01 |
| HBAZ  | P06467 | Hemoglobin subunit zeta                                       | Hbz     | 18 | 0.96 | 5.2E-01 | 19  | 1.09 | 1.4E-03 | 13  | 1.06 | 2.3E-02 | 11 | 0.93 | 1.1E-01 |
| CTNB1 | Q02248 | Catenin beta-1                                                | Ctnnb1  | 3  | 0.98 | 5.5E-01 | 2   | 1.42 | 1.8E-03 | 1   | 0.90 | 8.1E-04 | NA | NA   | NA      |
| PURA  | P42669 | Transcriptional activator protein Pur-alpha                   | Pura    | 4  | 1.03 | 5.7E-01 | 7   | 0.89 | 1.9E-03 | 1   | 0.85 | 6.2E-08 | 2  | 0.93 | 4.9E-01 |
| AATM  | P05202 | Aspartate aminotransferase, mito                              | Got2    | 62 | 1.02 | 5.8E-01 | 81  | 0.97 | 2.1E-04 | 36  | 0.97 | 3.5E-02 | 52 | 0.99 | 7.0E-01 |
| VISL1 | P62761 | Visinin-like protein 1                                        | Vsn1    | 31 | 1.02 | 6.5E-01 | 53  | 0.95 | 4.3E-06 | 10  | 1.05 | 3.1E-02 | 21 | 0.95 | 1.9E-01 |
| PALM  | Q9Z0P4 | Paralemmin-1                                                  | Palm    | 5  | 1.01 | 7.5E-01 | 3   | 1.68 | 3.1E-08 | 1   | 1.15 | 1.3E-03 | 2  | 0.97 | 7.6E-01 |
| 2AAA  | Q76MZ3 | Ser/Thr-protein phosphatase 2A 65 kDa reg subunit A a isoform | Ppp2r1a | 23 | 0.99 | 7.5E-01 | 69  | 1.04 | 2.1E-02 | 30  | 1.08 | 4.1E-09 | 23 | 0.98 | 6.1E-01 |
| HSP7C | P63017 | Heat shock cognate 71 kDa protein                             | Hspa8   | 77 | 1.01 | 7.8E-01 | 130 | 1.03 | 4.9E-04 | 111 | 1.02 | 2.8E-04 | 66 | 1.00 | 9.2E-01 |
| STIP1 | Q60864 | Stress-induced-phosphoprotein 1                               | Stip1   | 4  | 1.03 | 8.4E-01 | 13  | 0.91 | 1.8E-04 | 1   | 0.85 | 1.2E-02 | 6  | 1.00 | 9.1E-01 |
| PRDX6 | O08709 | Peroxiredoxin-6                                               | Prdx6   | 26 | 0.98 | 8.6E-01 | 41  | 0.95 | 3.5E-03 | 32  | 0.97 | 2.4E-02 | 17 | 0.99 | 7.4E-01 |
| NCAM1 | P13595 | Neural cell adhesion molecule 1                               | Ncam1   | 37 | 1.01 | 8.7E-01 | 19  | 1.08 | 4.9E-02 | 80  | 1.02 | 3.3E-02 | 19 | 1.03 | 6.3E-01 |
| 1433Z | P63101 | 14-3-3 protein zeta/delta                                     | Ywhaz   | 33 | 1.00 | 9.8E-01 | 72  | 1.04 | 1.3E-04 | 33  | 0.93 | 6.0E-06 | 34 | 1.00 | 9.4E-01 |

|       |        |                                                                |         |    |      |       |    |      |         |    |      |         |    |      |         |
|-------|--------|----------------------------------------------------------------|---------|----|------|-------|----|------|---------|----|------|---------|----|------|---------|
| SYT1  | P46096 | Synaptotagmin-1                                                | Syt1    | 28 | 1.00 | 1E+00 | 40 | 0.96 | 1.1E-02 | 40 | 1.08 | 2.2E-12 | 23 | 0.98 | 4.1E-01 |
| NDUS8 | Q8K3J1 | NADH dehydrogenase iron-sulfur protein 8, mito.                | Ndufs8  | NA | NA   | NA    | 1  | 0.92 | 1.6E-08 | 1  | 1.05 | 5.0E-03 | NA | NA   | NA      |
| 2ABA  | Q6P1F6 | Ser/Thr-protein phosphatase 2A 55 kDa reg. subunit B a isoform | Ppp2r2a | NA | NA   | NA    | 5  | 1.48 | 7.8E-05 | 1  | 0.92 | 1.4E-02 | NA | NA   | NA      |
| ARPC3 | Q9JM76 | Actin-related protein 2/3 complex subunit 3                    | Arpc3   | NA | NA   | NA    | 1  | 1.07 | 5.6E-03 | 1  | 1.05 | 1.1E-02 | 2  | 1.04 | 7.4E-01 |
| NRDC  | Q8BHG1 | Nardilysin                                                     | Nrd1    | NA | NA   | NA    | 2  | 0.90 | 4.0E-02 | 1  | 0.90 | 4.3E-03 | NA | NA   | NA      |
| RL31  | P62900 | 60S ribosomal protein L31                                      | Rpl31   | NA | NA   | NA    | 1  | 0.93 | 1.3E-04 | 1  | 1.07 | 6.1E-04 | NA | NA   | NA      |
| VPS39 | Q8R5L3 | Vam6/Vps39-like protein                                        | Vps39   | NA | NA   | NA    | 3  | 1.07 | 1.8E-02 | 1  | 0.83 | 2.0E-11 | NA | NA   | NA      |

**Overlap cohort 1 (FC) and cohort 1 (HC)**

|       |        |                                          |        |    |      |         |    |      |         |    |      |         |    |      |         |
|-------|--------|------------------------------------------|--------|----|------|---------|----|------|---------|----|------|---------|----|------|---------|
| G3P   | P16858 | Glyceraldehyde-3-phosphate dehydrogenase | Gapdh  | 53 | 1.06 | 7.3E-04 | 62 | 1.00 | 7.7E-01 | 72 | 0.98 | 6.3E-02 | 48 | 1.04 | 4.3E-02 |
| IDHG1 | P70404 | Isocitrate dehydrogenase [NAD] subunit 3 | Idh3g  | 4  | 1.14 | 3.1E-03 | NA | NA   | NA      | NA | NA   | NA      | 1  | 1.07 | 3.9E-03 |
| CBR1  | P48758 | Carbonyl reductase [NADPH] 1             | Cbr1   | 1  | 1.26 | 1.1E-02 | NA | NA   | NA      | NA | NA   | NA      | 1  | 1.17 | 4.8E-04 |
| MYPR  | P60202 | Myelin proteolipid protein               | Plp1   | 22 | 1.07 | 1.5E-02 | 28 | 0.98 | 3.7E-01 | 17 | 1.01 | 5.8E-01 | 32 | 0.94 | 3.2E-03 |
| TBA3  | P05214 | Tubulin alpha-3 chain                    | Tuba3a | 21 | 1.06 | 4.2E-02 | 34 | 1.01 | 8.3E-01 | 22 | 1.02 | 4.1E-01 | 21 | 1.05 | 2.0E-02 |

**Overlap cohort 2 (FC) and cohort 1 (HC)**

|       |        |                                             |           |    |      |         |    |      |         |    |      |         |    |      |         |
|-------|--------|---------------------------------------------|-----------|----|------|---------|----|------|---------|----|------|---------|----|------|---------|
| ATPD  | Q9D3D9 | ATP synthase subunit delta, mito.           | Atp5d     | 5  | 1.10 | 2.4E-01 | 3  | 0.96 | 6.5E-03 | 3  | 0.97 | 5.8E-01 | 5  | 0.90 | 6.2E-04 |
| UBA1  | Q02053 | Ubiquitin-like modifier-activating enzyme 1 | Uba1      | 21 | 1.03 | 2.5E-01 | 32 | 1.05 | 4.2E-02 | 34 | 1.02 | 1.2E-01 | 25 | 0.93 | 1.1E-02 |
| H32   | P84228 | Histone H3.2                                | Hist1h3b  | 11 | 1.03 | 4.4E-01 | 13 | 0.88 | 8.1E-05 | 7  | 1.04 | 2.0E-01 | 8  | 0.96 | 8.9E-03 |
| H14   | P43274 | Histone H1.4                                | Hist1h1e  | 2  | 1.02 | 4.5E-01 | 3  | 0.91 | 2.5E-02 | NA | NA   | NA      | 10 | 0.86 | 2.9E-02 |
| RSSA  | P14206 | 40S ribosomal protein SA                    | Rpsa      | 5  | 0.99 | 7.2E-01 | 2  | 1.09 | 4.2E-03 | 3  | 0.98 | 5.8E-01 | 1  | 0.95 | 1.2E-02 |
| VAMP2 | P63044 | Vesicle-associated membrane protein 2       | Vamp2     | 10 | 1.01 | 8.9E-01 | 23 | 1.07 | 2.2E-03 | 14 | 1.02 | 2.7E-01 | 8  | 1.08 | 5.5E-03 |
| H2B3A | Q9D2U9 | Histone H2B type 3-A                        | Hist3h2ba | 7  | 0.99 | 9.9E-01 | 4  | 0.74 | 6.5E-06 | 4  | 1.04 | 2.4E-01 | 3  | 0.94 | 4.6E-02 |
| ARP2  | P61161 | Actin-related protein 2                     | Actr2     | NA | NA   | NA      | 1  | 0.95 | 5.0E-03 | NA | NA   | NA      | 3  | 1.11 | 3.3E-02 |
| CSRP1 | P97315 | Cysteine and glycine-rich protein 1         | Csrp1     | NA | NA   | NA      | 7  | 1.18 | 2.2E-02 | NA | NA   | NA      | 3  | 0.88 | 1.1E-02 |
| EIF3H | Q91WK2 | Eukaryotic translation initiation factor 3H | Eif3h     | NA | NA   | NA      | 1  | 0.88 | 9.1E-03 | NA | NA   | NA      | 1  | 0.91 | 6.4E-04 |
| H2A1  | P22752 | Histone H2A type 1                          | Hist1h2ab | NA | NA   | NA      | 2  | 1.31 | 4.6E-02 | NA | NA   | NA      | 1  | 0.83 | 5.8E-07 |
| H2AJ  | Q8R1M2 | Histone H2A.J (H2a/j)                       | H2afj     | NA | NA   | NA      | 1  | 0.90 | 1.3E-06 | 4  | 0.92 | 2.4E-01 | 1  | 0.92 | 1.2E-03 |
| NCOA5 | Q91W39 | Nuclear receptor coactivator 5              | Ncoa5     | NA | NA   | NA      | 3  | 0.82 | 4.1E-02 | NA | NA   | NA      | 1  | 0.87 | 1.4E-02 |
| NSG1  | Q62092 | Neuron-specific protein family member 1     | Nsg1      | NA | NA   | NA      | 2  | 0.87 | 2.1E-02 | NA | NA   | NA      | 1  | 0.75 | 6.0E-03 |
| SRC8  | Q60598 | Src substrate cortactin                     | Ctnn      | NA | NA   | NA      | 5  | 0.92 | 2.4E-02 | 4  | 1.00 | 9.3E-01 | 4  | 0.90 | 2.3E-02 |

**Overlap cohorts combined INGEL (FC) and cohort 1 (HC)**

|       |        |                                        |       |    |      |         |     |      |         |    |      |         |    |      |         |
|-------|--------|----------------------------------------|-------|----|------|---------|-----|------|---------|----|------|---------|----|------|---------|
| HXX1  | P17710 | Hexokinase-1                           | Hk1   | 77 | 1.02 | 3.3E-01 | 153 | 0.99 | 3.3E-01 | 85 | 1.02 | 2.9E-02 | 87 | 0.95 | 4.7E-04 |
| PDIA3 | P27773 | Protein disulfide-isomerase A3         | Pdia3 | 4  | 0.99 | 8.8E-01 | 9   | 0.96 | 3.8E-01 | 7  | 1.10 | 2.1E-04 | 2  | 0.94 | 2.5E-02 |
| DDX17 | Q501J6 | Probable ATP-dependent RNA helicase 17 | Ddx17 | NA | NA   | NA      | NA  | NA   | NA      | 2  | 1.07 | 2.3E-02 | 1  | 1.09 | 3.7E-04 |
| HEXA  | P29416 | Beta-hexosaminidase subunit alpha 2    | Hexa  | NA | NA   | NA      | NA  | NA   | NA      | 1  | 1.13 | 1.4E-04 | 1  | 1.08 | 7.7E-03 |
| K2C75 | Q8BGZ7 | Keratin, type II cytoskeletal 75       | Krt75 | NA | NA   | NA      | 3   | 0.95 | 6.9E-01 | 30 | 1.03 | 3.5E-02 | 7  | 0.84 | 4.1E-02 |
| OTUB1 | Q7TQ13 | Ubiquitin thioesterase OTUB1           | Otub1 | NA | NA   | NA      | 2   | 0.92 | 2.3E-01 | 1  | 0.83 | 9.2E-07 | 1  | 0.80 | 5.9E-05 |
| SPTB1 | P15508 | Spectrin beta chain, erythrocytic      | Sptb  | NA | NA   | NA      | NA  | NA   | NA      | 1  | 0.75 | 8.8E-09 | 1  | 0.90 | 2.7E-02 |
