# Supplementary material for: System-based proteomic and metabonomic analysis of the Df(16)A+/− mouse identifies potential miR-185 targets and molecular pathway alterations
Source: PubMed Central journal article supplement — Mol Psychiatry. 2016 Mar 22;22(3):384–95. doi: 10.1038/mp.2016.27 (PMC5322275; doi:10.1038/mp.2016.27), 2016-03-22
Supplement: mp201627x5.pdf [file mp201627x5.pdf]

**Supplementary Table S5: Overview metabolic profiling and MS/MS fragmentation**

| Rank                  | mz_Rt pair  | Ion mode | mz (median RT) | HMDB/<br>Chempub ID | Name                   | Class/Function                                                                 | Formula                                   | Exact Mass              | Delta (mass-exact mass) | MS/MS              | Ratio | p.value    |
|-----------------------|-------------|----------|----------------|---------------------|------------------------|--------------------------------------------------------------------------------|-------------------------------------------|-------------------------|-------------------------|--------------------|-------|------------|
| <b>Frontal Cortex</b> |             |          |                |                     |                        |                                                                                |                                           |                         |                         |                    |       |            |
| 1                     | 645.5/1323  | +        | 645.53833      | 1323.0              | LMSP03020039           | PE-Cer(d14:2(4E,6E)/19:0)<br>PE-Cer(d15:2(4E,6E)/18:0)                         | Ceramide phosphoethanolamines<br>[SP0302] | C35H70N2O6P             | 644.4893                | 6.465E-05          | ID    | 0.64 0.000 |
| 2                     | 342.3/1378  | +        | 342.31627      | 1378.2              | -                      | not identified                                                                 | -                                         | -                       | -                       | -                  | -     | 0.61 0.004 |
| 3                     | 426.4/681   | +        | 426.36226      | 681.1               | HMDB06464<br>HMDB05065 | Elaidic carnitine<br>Oleoylcarnitine                                           | Acyl Carnitine<br>Acyl Carnitine          | C25H47NO4<br>C25H47NO4  | 425.3505                | 4.5E-03            | ID    | 0.59 0.010 |
| 4                     | 232.2/270   | +        | 232.16595      | 269.9               | HMDB02013              | Butyrylcarnitine                                                               | Acyl Carnitine                            | C10H21N3O3              | 231.147                 | 4.4E-03            | ID    | 0.33 0.013 |
| 5                     | 448.3/667   | +        | 448.34585      | 666.6               | 74380333<br>123060515  | N-docosanoyl taurine<br>N-stearoyl tyrosine                                    | N-acyl amine<br>N-acyl amine              | C24H49NO4S<br>C27H45NO4 | 447.3382<br>447.3349    | 4.0E-04<br>3.7E-03 | NP    | 0.70 0.013 |
| 6                     | 765.6/1179  | +        | 765.59871      | 1178.7              | 123064881              | PG(O-20:0/16:0)/PG(O-16:0/20:0)                                                | Glycerophosphoglycerol                    | C42H85O9P               | 764.5931                | 1.6E-03            | ID    | 0.69 0.022 |
| 7                     | 238.9/26    | +        | 238.9299       | 26.0                | -                      | not identified                                                                 | -                                         | -                       | -                       | -                  | -     | 0.57 0.022 |
| 8                     | 171.2/647.1 | +        | 171.2          | 647.1               | -                      | not identified                                                                 | -                                         | -                       | -                       | -                  | -     | 3.69 0.028 |
| 9                     | 510.6/565   | +        | 541.6          | 565.0               | -                      | not identified                                                                 | -                                         | -                       | -                       | -                  | -     | 2.13 0.028 |
| 10                    | 367.1/609   | +        | 367.07582      | 609.4               | 8439                   | Salicin 6-phosphate                                                            | Glycoside phosphate                       | C13H19O10P              | 366.0716                | 3.0E-03            | NP    | 1.44 0.035 |
| 11                    | 650.4/1019  | +        | 650.43472      | 1019.1              | 135642574              | PC(16:0/9:0(CHO))                                                              | Phosphatidylcholine                       | C33H64NO9P              | 649.4319                | 4.5E-03            | NP    | 0.71 0.035 |
| 12                    | 299.2/619   | +        | 299.2          | 619.0               | -                      | not identified                                                                 | -                                         | -                       | -                       | -                  | -     | 1.59 0.035 |
| 13                    | 530.5/1146  | +        | 530.53018      | 1145.5              | -                      | Water loss from #16 (548.5, 1146sec)                                           | -                                         | -                       | -                       | -                  | ID    | 0.58 0.035 |
| 14                    | 130/25      | +        | 130.03074      | 25.3                | HMDB33561              | 2-Acetyl-4,5-dihydrothiazole                                                   | -                                         | C5H7NOS                 | 129.0248                | 1.4E-03            | NP    | 0.70 0.043 |
| 15                    | 184.1/1095  | +        | 184.08643      | 1094.6              | HMDB33141              | Fragment of a phosphatidylcholine                                              | -                                         | C11H9N3                 | 183.0796                | 5.0E-04            | ID    | 1.33 0.043 |
| 16                    | 548.5/1146  | +        | 548.54009      | 1145.7              | -                      | not identified                                                                 | -                                         | -                       | -                       | -                  | -     | 0.64 0.043 |
| 17                    | 550.6/1035  | +        | 550.62811      | 1035.2              | LMSP00000005           | Cer(m18:1(4E)/18:0)                                                            | Ceramide/Sphingolipid                     | C36H71NO2               | 549.5485                | 0.00013            | ID    | 0.55 0.043 |
| 18                    | 618.5/1252  | +        | 618.51154      | 1252.4              | -                      | not identified                                                                 | -                                         | -                       | -                       | -                  | -     | 0.58 0.043 |
| 19                    | 631.6/1302  | +        | 631.6175       | 1301.7              | LMSP03020003           | PE-Cer(d14:1(4E)/18:1(9Z))/PE-Cer(d14:2(4E,6E)/18:0)/PE-Cer(d16:2(4E,6E)/16:0) | Ceramide phosphoethanolamines             | C34H67N2O6P             | 630.4737                | 0.00022            | ID    | 0.68 0.043 |
| 20                    | 252.1/526   | +        | 252.1362       | 526.0               | HMDB00101              | Deoxyadenosine                                                                 | Purine Nucleosides and Analogues          | C10H13N5O3              | 251.101                 | 0.00412            | NP    | 2.62 0.043 |
| 21                    | 643.5/1269  | +        | 643.5198       | 1269.0              | HMDB07312              | DG(18:3(9Z,12Z,15Z)/20:2(11Z,14Z)/0:0)[iso2] (several)                         | Diacylglycerol                            | C41H70O5                | 642.5223                | 9.8E-03            | NP    | 0.60 0.043 |

| Rank               | mz_Rt pair | Ion mode | mz (median RT) | HMDB/<br>Chempub ID    | Name                                                              | Class/Function                             | Formula                  | Exact Mass           | Delta (mass exact mass) | MS/MS | Ratio | p.value |
|--------------------|------------|----------|----------------|------------------------|-------------------------------------------------------------------|--------------------------------------------|--------------------------|----------------------|-------------------------|-------|-------|---------|
| <b>Hippocampus</b> |            |          |                |                        |                                                                   |                                            |                          |                      |                         |       |       |         |
| 1                  | 382.3_619  | +        | 382.301 619.1  | 4266008<br>24701448    | Prostaglandin F2 alpha dimethyl amide<br>5,6-DiHETrE-EA (several) | Prostaglandin<br>Endocannabinoid           | C22H39NO4                | 381.2879             | 5.8E-03                 | NP    | 0.39  | 0.003   |
| 2                  | 535.5_1310 | +        | 535.469 1309.7 | -                      | not identified                                                    | -                                          | -                        | -                    | -                       | -     | 0.55  | 0.003   |
| 3                  | 716.8_529  | +        | 716.787 528.8  | -                      | not identified                                                    | -                                          | -                        | -                    | -                       | -     | 0.57  | 0.003   |
| 4                  | 308.1_219  | +        | 308.056 218.8  | -                      | not identified                                                    | -                                          | -                        | -                    | -                       | -     | 0.48  | 0.023   |
| 5                  | 771.6_1472 | +        | 771.633 1471.8 | 123068775<br>123067209 | SM(d18:2/21:0)<br>PA(O-20:0/22:2(13Z,16Z))                        | Ceramide posphocholine<br>Glycerophosphate | C44H87N2O6P<br>C45H87O7P | 770.6302<br>770.6189 | 4.5E-03<br>6.8E-03      | NP    | 0.57  | 0.023   |
| 6                  | 658.2_529  | +        | 658.192 528.8  | -                      | not identified                                                    | -                                          | -                        | -                    | -                       | -     | 0.65  | 0.023   |
| 7                  | 651.1_134  | +        | 651.101 134.3  | -                      | not identified                                                    | -                                          | -                        | -                    | -                       | -     | 0.52  | 0.031   |
| 8                  | 359.2_661  | +        | 359.246 661.4  | HMDB12983              | Kinetensin 1-3                                                    | Peptide                                    | C15H30N6O4               | 358.2329             | 5.9E-03                 | NP    | 0.56  | 0.031   |
| 9                  | 799.7_1372 | +        | 799.661 1371.8 | 123068785              | SM(d17:1/24:1) or SM(d18:2/23:0)                                  | Sphingomyelin                              | C46H91N2O6P              | 798.6615             | 7.8E-03                 | ID    | 1.72  | 0.031   |
| 10                 | 626.5_1146 | +        | 626.519 1146.3 | -                      | not identified                                                    | -                                          | -                        | -                    | -                       | -     | 0.58  | 0.031   |
| 11                 | 360.3_662  | +        | 661.535 360.3  | -                      | S-palmitoyl-L-cysteine                                            | Palmitoylated residue                      | C19H37NO3S               | 359.2494             | 5.7E-03                 | NP    | 0.59  | 0.031   |
| 12                 | 550.4_1299 | +        | 550.417 1299.4 | -                      | not identified                                                    | -                                          | -                        | -                    | -                       | -     | 0.62  | 0.031   |
| 13                 | 140.1_1645 | +        | 140.082 1644.9 | 207572<br>5035         | 4-Amino-5-hydroxymethyl-2-methylpyrimidine<br>L-Histidinal        | Thiamin metabolism<br>Histidin metabolism  | C6H9N3O<br>C6H9N3O       | 139.0746             | 1.7E-04                 | NP    | 0.35  | 0.042   |
| 14                 | 390.3_1230 | +        | 390.283 1230.0 | -                      | not identified                                                    | -                                          | -                        | -                    | -                       | -     | 0.63  | 0.042   |
| 15                 | 545.3_725  | +        | 545.343 724.5  | -                      | PC (no database match, Isotope of 544.3 (PC 20:4))                | -                                          | -                        | -                    | -                       | T     | 0.67  | 0.042   |
| 16                 | 882.6_1302 | +        | 882.593 1302.0 | 123061384              | PC(22:5(4Z,7Z,10Z,13Z,16Z)/22:5(4Z,7Z,10Z,13Z,16Z))               | Phophatidylcholine                         | C52H84NO8P               | 881.5935             | 7.7E-03                 | NP    | 0.69  | 0.042   |
| 17                 | 280.2_254  | +        | 280.222 254.4  | -                      | not identified                                                    | -                                          | -                        | -                    | -                       | -     | 0.70  | 0.042   |
| 1                  | 479.3_760  | -        | 479.297 759.93 | -                      | Phospholipid - ID cannot be confirmed                             | -                                          | -                        | -                    | -                       | T     | 0.55  | 3E-05   |
| 2                  | 853.6_1138 | -        | 853.574 1138.4 | -                      | not identified                                                    | -                                          | -                        | -                    | -                       | -     | 0.007 |         |
| 3                  | 218.1_300  | -        | 218.103 299.67 | 149588                 | Pantothenic acid                                                  | Vitamine                                   | C9H17NO5                 | 219.1107             | 4.6E-05                 | NP    | 0.80  | 0.019   |
| 4                  | 194.1_632  | -        | 194.082 632.37 | HMDB14903<br>HMDB29217 | Metyrosine<br>Tyrosine methylester                                | Tyrosine<br>Tyrosine                       | C10H13NO3<br>C10H13NO3   | 195.0895             | 2.3E-04                 | NP    | 0.61  | 0.023   |
| 5                  | 566.3_758  | -        | 566.343 758    | LMGP01050056           | PC(22:6(4Z,7Z,10Z,13Z,16Z,19Z)/0:0)                               | Glycerophosphocholine                      | C30H50NO7P               | 567.3325             | 3.196E-05               | ID    | 1.30  | 0.023   |
| 6                  | 567.3_758  | -        | 567.348        | -                      | Isotope of 566.3, 758 sec                                         | -                                          | -                        | -                    | -                       | -     |       |         |
| 7                  | 149_1534   | -        | 149.004 1533.6 | -                      | not identified                                                    | -                                          | -                        | -                    | -                       | -     | 0.029 |         |
| 8                  | 442.3_661  | -        | 442.278 660.7  | -                      | not identified                                                    | -                                          | -                        | -                    | -                       | -     | 0.035 |         |
| 9                  | 480.3_746  | -        | 480.309 746.3  | LMGP01060010           | PC(O-16:0/0:0)                                                    | Phosphatidylcholine                        | C24H52NO6P               | 481.3532             | -7.75E-05               | ID    | 1.43  | 0.043   |
| 10                 | 532.3_815  | -        | 532.301 814.95 | LMSP02010055           | Cer(d14:2(4E,6E)/20:1(11Z))                                       | N-acylsphingosines (ceramides)             | C34H63NO3                | 533.4808             | -0.000325               | ID    | 0.70  | 0.043   |
